# Supplementary material for: Pax6 Is Required for Normal Cell-Cycle Exit and the Differentiation Kinetics of Retinal Progenitor Cells
Source: PubMed Central journal article supplement (PMC3779171; doi:10.1371/journal.pone.0076489), 2013-09-20
Supplement: pone.0076489.s011.pdf [file pone.0076489.s011.pdf]

**Table S3. List of primary antibodies used in this study.**

| <b>Antigen</b>            | <b>Source</b> | <b>Manufacturer</b>    | <b># Catalog</b> | <b>Dilution</b> |
|---------------------------|---------------|------------------------|------------------|-----------------|
| <i>Pax6</i>               | Mouse         | Santa Cruz             | Sc-32766         | 1:25            |
| <i>Syntaxin</i>           | Mouse         | Sigma                  | s0664            | 1:400           |
| <i>bHLHb5</i>             | Goat          | Santa Cruz             | sc-6045          | 1:300           |
| <i>AP2a</i>               | Mouse         | Santa Cruz             | sc-12726         | 1:50            |
| <i>Ptf1a</i>              | Rabbit        | Kind gift of H. Edlund |                  | 1:500           |
| <i>GABA</i>               | Rabbit        | Sigma                  | A2052            | 1:500           |
| <i>Sox2</i>               | Rabbit        | Chemicon               | AB5603           | 1:500           |
| <i>Vsx2</i>               | Sheep         | Exalpha                | X1180P           | 1:800           |
| <i>BrdU</i>               | Mouse         | Chemicon               | MAB3222          | 1:100           |
| <i>PCNA</i>               | Rabbit        | Thermo Scientific      | RB9055           | 1:100           |
| <i>Ki67</i>               | Rabbit        | Thermo Scientific      | RM9106           | 1:200           |
| <i>Ki67</i>               | Rat           | Dako                   | M7249            | 1:100           |
| <i>Ccnd1</i>              | Rabbit        | Thermo Scientific      | Rm9104           | 1:250           |
| <i>Ccnd1</i>              | Mouse         | Santa Cruz             | Sc-450           | 1:50            |
| <i>Ccnd2</i>              | Rabbit        | Santa Cruz             | sc-593           | 1:50            |
| <i>Ccnd3</i>              | Rabbit        | Santa Cruz             | sc-182           | 1:50            |
| <i>P27<sup>Kip1</sup></i> | Rabbit        | Thermo Scientific      | RB9019           | 1:100           |
| <i>P57<sup>Kip2</sup></i> | Goat          | Santa Cruz             | sc-1039          | 1:50            |
