# Supplementary material for: Pax6 Is Required for Normal Cell-Cycle Exit and the Differentiation Kinetics of Retinal Progenitor Cells
Source: PLoS One. 2013 Sep 20;8(9):e76489. doi: 10.1371/journal.pone.0076489 (PMC3779171; doi:10.1371/journal.pone.0076489)
Supplement: Table S1 — List of differentially expressed genes following Pax6 loss in Pax6loxP/loxP;α-Cre and control mice. (XLS) [file pone.0076489.s009.xls]

## Sheet: Pax6loxPloxP;a-Cre E12 array
Altered genes in the distal retina Pax6 loxP/loxP a-Cre vs. control at E12
affy_id	fc	Up/Down	Symbol	Refseq	GeneTitle
1435109_at	1.5	UP	0710007G10Rik	NM_028223	RIKEN cDNA 0710007G10 gene /// RIKEN cDNA 3010001K23 gene
1430101_at	1.5	UP	6330406O05Rik		RIKEN cDNA 6330406O05 gene
1450136_at	1.5	UP	Cd38	NM_007646	CD38 antigen
1440799_s_at	1.5	UP	Farp2	NM_145519	FERM, RhoGEF and pleckstrin domain protein 2
1452583_s_at	1.5	UP	Galm	NM_176963	galactose mutarotase
1418483_a_at	1.5	UP	Ggta1	NM_010283	glycoprotein galactosyltransferase alpha 1, 3
1456341_a_at	1.5	UP	Klf9	NM_010638	Kruppel-like factor 9
1423506_a_at	1.5	UP	Nnat	NM_010923	neuronatin
1417856_at	1.5	UP	Relb	NM_009046	avian reticuloendotheliosis viral (v-rel) oncogene related B
1420918_at	1.5	UP	Sgk3	NM_177547	serum/glucocorticoid regulated kinase 3
1424383_at	1.5	UP	Tmem51	NM_145402	transmembrane protein 51
1455256_at	1.5	UP	Tnik	XM_130797	TRAF2 and NCK interacting kinase
1419606_a_at	1.5	UP	Tnnt1	NM_011618	troponin T1, skeletal, slow
1416927_at	1.5	UP	Trp53inp1	NM_021897	transformation related protein 53 inducible nuclear protein 1
1437250_at	1.5	UP	Wdt2	NM_001005423
1420357_s_at	1.5	UP	Xlr3a	NM_011726	X-linked lymphocyte-regulated 3A /// X-linked lymphocyte-regulated 3B /// hypothetical protein LOC574437
1457124_at	1.5	UP			Transcribed locus
1421203_at	1.5015	DOWN	Chrna4	NM_015730	cholinergic receptor, nicotinic, alpha polypeptide 4
1450049_a_at	1.5015	DOWN	Hira	NM_010435	histone cell cycle regulation defective homolog A (S. cerevisiae)
1421194_at	1.5015	DOWN	Itga4	NM_010576	integrin alpha 4
1442680_at	1.5015	DOWN	Ncam1	NM_010875	Activated spleen cDNA, RIKEN full-length enriched library, clone:F830004L08 product:unclassifiable, full insert sequence
1453451_at	1.50376	DOWN	6820402I19Rik		RIKEN cDNA 6820402I19 gene
1444992_at	1.50376	DOWN	AI120166		expressed sequence AI120166
1458385_at	1.50376	DOWN	Hspa4l	NM_011020	heat shock 70kDa protein 4 like
1436205_at	1.50376	DOWN	Nfasc	NM_182716	Neurofascin, mRNA (cDNA clone IMAGE:5686983)
1441272_at	1.50602	DOWN	Matr3	NM_010771	Matrin 3, mRNA (cDNA clone MGC:28206 IMAGE:3989914)
1444763_at	1.50602	DOWN	Ptprk	NM_008983	Protein tyrosine phosphatase, receptor type, K, mRNA (cDNA clone IMAGE:3492261)
1419816_s_at	1.51	UP	1300002F13Rik	NM_133753	ERBB receptor feedback inhibitor 1
1456146_at	1.51	UP	2210411A11Rik		RIKEN cDNA 2210411A11 gene
1416893_at	1.51	UP	3110001A13Rik	NM_025626	RIKEN cDNA 3110001A13 gene
1454647_at	1.51	UP	5730439E10Rik	NM_175324	RIKEN cDNA 5730439E10 gene
1426315_a_at	1.51	UP	6330416G13Rik	NM_144905	RIKEN cDNA 6330416G13 gene
1446380_at	1.51	UP	9430076C15Rik	NM_177095	RIKEN cDNA 9430076C15 gene
1449289_a_at	1.51	UP	B2m	NM_009735	beta-2 microglobulin
1450224_at	1.51	UP	Col4a3	NM_007734	procollagen, type IV, alpha 3
1458148_at	1.51	UP	D230007K08Rik	XM_484522	RIKEN cDNA D230007K08 gene
1416418_at	1.51	UP	Gabarapl1	NM_020590	gamma-aminobutyric acid (GABA(A)) receptor-associated protein-like 1
1415801_at	1.51	UP	Gja1	NM_010288	gap junction membrane channel protein alpha 1
1448942_at	1.51	UP	Gng11	NM_025331	guanine nucleotide binding protein (G protein), gamma 11
1423436_at	1.51	UP	Gsta3	NM_010356	glutathione S-transferase, alpha 3
1418929_at	1.51	UP	Ift57	NM_028680
1454159_a_at	1.51	UP	Igfbp2	NM_008342	insulin-like growth factor binding protein 2
1452690_at	1.51	UP	Khsrp	NM_010613	KH-type splicing regulatory protein
1418449_at	1.51	UP	Lad1	NM_133664	ladinin
1427485_at	1.51	UP	Lmod1	NM_053106	leiomodin 1 (smooth muscle)
1424791_a_at	1.51	UP	Lu	NM_020486	Lutheran blood group (Auberger b antigen included)
1455214_at	1.51	UP	Mitf	NM_008601	microphthalmia-associated transcription factor
1449071_at	1.51	UP	Myl7	NM_022879	myosin, light polypeptide 7, regulatory
1460336_at	1.51	UP	Ppargc1a	NM_008904	peroxisome proliferative activated receptor, gamma, coactivator 1 alpha
1419416_a_at	1.51	UP	Rarg	NM_011244	retinoic acid receptor, gamma
1431030_a_at	1.51	UP	Rnf14	NM_020012	ring finger protein 14
1452333_at	1.51	UP	Smarca2	NM_011416	SWI/SNF related, matrix associated, actin dependent regulator of chromatin, subfamily a, member 2
1431708_a_at	1.51	UP	Tia1	NM_011585	cytotoxic granule-associated RNA binding protein 1
1426260_a_at	1.51	UP	Ugt1a6a	NM_145079
1426164_a_at	1.51	UP	Usf1	NM_009480	upstream transcription factor 1
1441687_at	1.51	UP	Wnt4	NM_009523	Wingless-related MMTV integration site 4 (Wnt4), mRNA
1455523_at	1.51057	DOWN	Cstf2	NM_133196	cleavage stimulation factor, 3' pre-RNA subunit 2
1425773_s_at	1.51057	DOWN	Nmnat1	NM_133435	nicotinamide nucleotide adenylyltransferase 1
1440682_at	1.51057	DOWN	Odz4	NM_011858	Odd Oz/ten-m homolog 4 (Drosophila) (Odz4), mRNA
1459627_at	1.51057	DOWN	Sc4mol	NM_025436	Sterol-C4-methyl oxidase-like, mRNA (cDNA clone MGC:11745 IMAGE:3152545)
1445537_at	1.51057	DOWN	Srgap3	NM_080448	SLIT-ROBO Rho GTPase activating protein 3 (Srgap3), transcript variant 2, mRNA
1451008_at	1.51057	DOWN	St8sia3	NM_009182	ST8 alpha-N-acetyl-neuraminide alpha-2,8-sialyltransferase 3
1419253_at	1.51286	DOWN	Mthfd2	NM_008638	methylenetetrahydrofolate dehydrogenase (NAD+ dependent), methenyltetrahydrofolate cyclohydrolase
1459441_at	1.51286	DOWN	Odz3	NM_011857	ODZ3 (Odz3)
1440311_at	1.51286	DOWN	Sorbs1	NM_009166	sorbin and SH3 domain containing 1
1436892_at	1.51286	DOWN	Spred2	NM_033523	sprouty-related, EVH1 domain containing 2
1457797_at	1.51515	DOWN	AI605517		expressed sequence AI605517
1446048_at	1.51515	DOWN	Cdh11	NM_009866	Cadherin 11 (Cdh11), mRNA
1450647_at	1.51515	DOWN	Hps3	NM_080634	Hermansky-Pudlak syndrome 3 homolog (human)
1451047_at	1.51515	DOWN	Itm2a	NM_008409	integral membrane protein 2A
1417419_at	1.51745	DOWN	Ccnd1	NM_007631	cyclin D1
1418366_at	1.51745	DOWN	Hist2h2aa1	NM_013549	histone 2, H2aa1 /// histone 1, H2ad /// histone 1, H2an /// histone 2, H2ab /// histone 2, H2ac /// histone 2, H2aa2
1458788_at	1.51745	DOWN	Nf1	NM_010897	NF1GRP mRNA for neurofibromatosis type-1-GTPase activating-protein type IV
1438220_at	1.51976	DOWN	Foxj3	NM_172699	forkhead box J3
1445928_at	1.51976	DOWN	March6	NM_172606	membrane-associated ring finger (C3HC4) 6
1455566_s_at	1.52	UP	2810022L02Rik	NM_144882	RIKEN cDNA 2810022L02 gene
1440862_at	1.52	UP	5930418K15Rik		RIKEN cDNA 5930418K15 gene (5930418K15Rik), mRNA
1454967_at	1.52	UP	A930001N09Rik	NM_029870	RIKEN cDNA A930001N09 gene (A930001N09Rik), mRNA
1420408_a_at	1.52	UP	Abcc9	NM_021041	ATP-binding cassette, sub-family C (CFTR/MRP), member 9
1451780_at	1.52	UP	Blnk	NM_008528	B-cell linker
1425175_at	1.52	UP	C1ql3	NM_153155	C1q-like 3
1424762_at	1.52	UP	C1qtnf5	NM_145613	C1q and tumor necrosis factor related protein 5 /// membrane-type frizzled-related protein
1416051_at	1.52	UP	C2	NM_013484	complement component 2 (within H-2S)
1427618_at	1.52	UP	Cdh9	XM_487374	cadherin 9
1429413_at	1.52	UP	Cpm	XM_125830	carboxypeptidase M
1448995_at	1.52	UP	Cxcl4	NM_019932	chemokine (C-X-C motif) ligand 4
1437347_at	1.52	UP	Ednrb	NM_007904	endothelin receptor type B
1457045_at	1.52	UP	Galnt13	NM_173030	UDP-N-acetyl-alpha-D-galactosamine:polypeptide N-acetylgalactosaminyltransferase 13
1434007_at	1.52	UP	Gyltl1b	NM_172670	glycosyltransferase-like 1B
1418106_at	1.52	UP	Hey2	NM_013904	hairy/enhancer-of-split related with YRPW motif 2
1422871_at	1.52	UP	Kcnj12	NM_010603	potassium inwardly-rectifying channel, subfamily J, member 12
1448169_at	1.52	UP	Krt1-18	NM_010664	keratin complex 1, acidic, gene 18
1416503_at	1.52	UP	Lxn	NM_016753	latexin
1437430_at	1.52	UP	Matp	NM_053077	solute carrier family 45, member 2
1434036_at	1.52	UP	Mtss1	NM_144800	metastasis suppressor 1
1418211_at	1.52	UP	p	NM_021879	pink-eyed dilution
1437165_a_at	1.52	UP	Pcolce	NM_008788	procollagen C-endopeptidase enhancer protein
1450967_at	1.52	UP	Ptplad2	NM_025760
1428016_a_at	1.52	UP	Rasip1	NM_028544	Ras interacting protein 1
1449319_at	1.52	UP	Rspo1	NM_138683
1421657_a_at	1.52	UP	Sox17	NM_011441	SRY-box containing gene 17
1437312_at	1.52207	DOWN	Bmpr1b	NM_007560	bone morphogenetic protein receptor, type 1B
1429902_at	1.52439	DOWN	5830443J22Rik		RIKEN cDNA 5830443J22 gene
1423463_a_at	1.52439	DOWN	D2Ertd750e	NM_026412	DNA segment, Chr 2, ERATO Doi 750, expressed
1418139_at	1.52439	DOWN	Dcx	NM_010025	doublecortin
1456281_at	1.52439	DOWN	Fbxl18	XM_485692	F-box and leucine-rich repeat protein 18
1443111_at	1.52439	DOWN	Plekha1	NM_133942	pleckstrin homology domain containing, family A (phosphoinositide binding specific) member 1
1418558_at	1.52439	DOWN	Rax	NM_013833	retina and anterior neural fold homeobox
1439195_at	1.52439	DOWN
1447159_at	1.52439	DOWN
1430228_at	1.52672	DOWN	Dtl	NM_029766	denticleless homolog (Drosophila)
1420838_at	1.52672	DOWN	Ntrk2	NM_001025074	neurotrophic tyrosine kinase, receptor, type 2
1419224_at	1.52905	DOWN	Cecr6	NM_033567	cat eye syndrome chromosome region, candidate 6 homolog (human)
1443734_at	1.52905	DOWN	D5Wsu148e		DNA segment, Chr 5, Wayne State University 148, expressed
1449484_at	1.52905	DOWN	Stc2	NM_011491	stanniocalcin 2
1422748_at	1.52905	DOWN	Zfhx1b	NM_015753	zinc finger homeobox 1b
1431880_at	1.53	UP	3100003M19Rik		RIKEN cDNA 3100003M19 gene
1456500_at	1.53	UP	Aph1b	NM_177583	anterior pharynx defective 1b homolog (C. elegans)
1423422_at	1.53	UP	Asb4	NM_023048	ankyrin repeat and SOCS box-containing protein 4
1422710_a_at	1.53	UP	Cacna1h	NM_021415	calcium channel, voltage-dependent, T type, alpha 1H subunit
1421267_a_at	1.53	UP	Cited2	NM_010828	Cbp/p300-interacting transactivator, with Glu/Asp-rich carboxy-terminal domain, 2
1417318_at	1.53	UP	Dbccr1	NM_019967	deleted in bladder cancer chromosome region candidate 1 (human)
1450931_at	1.53	UP	Dock9	XM_358315	dedicator of cytokinesis 9
1416601_a_at	1.53	UP	Dscr1	NM_019466	Down syndrome critical region homolog 1 (human)
1436733_at	1.53	UP	E130309F12Rik	NM_178756	RIKEN cDNA E130309F12 gene
1434725_at	1.53	UP	Gramd1c	NM_153528
1418697_at	1.53	UP	Inmt	NM_009349	indolethylamine N-methyltransferase
1437631_at	1.53	UP	Kcnip4	NM_030265	Kv channel interacting protein 4
1415855_at	1.53	UP	Kitl	NM_013598	kit ligand
1423413_at	1.53	UP	Ndrg1	NM_010884	N-myc downstream regulated gene 1
1422300_at	1.53	UP	Nog	NM_008711	noggin
1418084_at	1.53	UP	Nrp1	NM_008737	neuropilin 1
1415806_at	1.53	UP	Plat	NM_008872	plasminogen activator, tissue
1429571_a_at	1.53	UP	Spaca1	NM_026293	sperm acrosome associated 1
1419088_at	1.53	UP	Timp3	NM_011595	tissue inhibitor of metalloproteinase 3
1443197_at	1.53	UP	Wnt9b	NM_011719	wingless-type MMTV integration site 9B
1428798_s_at	1.53139	DOWN	0610039J04Rik	NM_025615	RIKEN cDNA 0610039J04 gene
1442159_at	1.53139	DOWN	D2Ertd48e		DNA segment, Chr 2, ERATO Doi 48, expressed
1445091_at	1.53374	DOWN	ATR	NM_019864	ataxia telangiectasia and Rad3 related
1425303_at	1.53374	DOWN	Gck	NM_010292	glucokinase
1453768_a_at	1.5361	DOWN	5430432M24Rik	NM_146127	RIKEN cDNA 5430432M24 gene
1435497_at	1.5361	DOWN	BC028450	NM_173790	0
1427743_at	1.5361	DOWN	Gm672	NM_201354	NF-IL6 3'UTR-specific binding protein (Nbf) mRNA, partial sequence
1445773_at	1.5361	DOWN	Meis1	NM_010789	Myeloid ecotropic viral integration site 1, mRNA (cDNA clone MGC:36059 IMAGE:5344307)
1439927_at	1.5361	DOWN
1455852_at	1.53846	DOWN	4833432M17Rik	NM_198654	RIKEN cDNA 4833432M17 gene
1456563_at	1.53846	DOWN	4933429F08Rik	NM_177828	RIKEN cDNA 4933429F08 gene
1434789_at	1.53846	DOWN	Depdc1b	NM_178683	DEP domain containing 1B
1446940_at	1.53846	DOWN	Traf6	NM_009424	Tnf receptor-associated factor 6
1452366_at	1.54	UP	4732435N03Rik	NM_172753	RIKEN cDNA 4732435N03 gene
1422699_at	1.54	UP	Alox12	NM_007440	arachidonate 12-lipoxygenase
1454745_at	1.54	UP	Arhgap29	NM_172525	Rho GTPase activating protein 29
1425108_a_at	1.54	UP	BC004728	NM_174992	cDNA sequence BC004728
1425764_a_at	1.54	UP	Bcat2	NM_009737	branched chain aminotransferase 2, mitochondrial
1454880_s_at	1.54	UP	Bmf	NM_138313	Bcl2 modifying factor
1456046_at	1.54	UP	C1qr1	NM_010740	complement component 1, q subcomponent, receptor 1
1453063_at	1.54	UP	Cltb	NM_028870	clathrin, light polypeptide (Lcb)
1420617_at	1.54	UP	Cpeb4	NM_026252	cytoplasmic polyadenylation element binding protein 4
1430135_at	1.54	UP	Dnase2a	NM_010062	deoxyribonuclease II alpha
1425199_a_at	1.54	UP	Epb4.1l5	NM_145506	erythrocyte protein band 4.1-like 5
1422917_at	1.54	UP	Epha1	NM_023580	Eph receptor A1
1416023_at	1.54	UP	Fabp3	NM_010174	fatty acid binding protein 3, muscle and heart
1457356_at	1.54	UP	Igf2r	NM_010515	Insulin-like growth factor 2 receptor (Igf2r), mRNA
1452114_s_at	1.54	UP	Igfbp5	NM_010518	insulin-like growth factor binding protein 5
1428221_at	1.54	UP	Klhdc8b	NM_030075
1439078_at	1.54	UP	Klhl4	NM_172781	kelch-like 4 (Drosophila)
1449731_s_at	1.54	UP	NFKBIA	NM_010907	nuclear factor of kappa light polypeptide gene enhancer in B-cells inhibitor, alpha
1423086_at	1.54	UP	Npc1	NM_008720	Niemann Pick type C1
1438796_at	1.54	UP	nr4a3	NM_015743	nuclear receptor subfamily 4, group A, member 3
1428896_at	1.54	UP	Pdgfrl	NM_026840	platelet-derived growth factor receptor-like
1418203_at	1.54	UP	Pmaip1	NM_021451	phorbol-12-myristate-13-acetate-induced protein 1
1450295_s_at	1.54	UP	Pvr	NM_027514	poliovirus receptor
1418892_at	1.54	UP	Rhoj	NM_023275	ras homolog gene family, member J
1448415_a_at	1.54	UP	Sema3b	NM_009153	sema domain, immunoglobulin domain (Ig), short basic domain, secreted, (semaphorin) 3B
1416635_at	1.54	UP	Smpdl3a	NM_020561	sphingomyelin phosphodiesterase, acid-like 3A
1431530_a_at	1.54	UP	Tspan5	NM_019571	tetraspanin 5
1420944_at	1.54	UP	Zfp185	NM_009549	zinc finger protein 185
1456960_at	1.54083	DOWN	Adk	NM_134079	Adenosine kinase (Adk), mRNA
1455790_at	1.54083	DOWN	E2f2	NM_177733	E2F transcription factor 2
1439992_at	1.54083	DOWN	Gm1476	XM_357972	gene model 1476, (NCBI)
1423377_at	1.54083	DOWN	Igfbpl1	NM_018741	insulin-like growth factor binding protein-like 1
1417939_at	1.54083	DOWN	Rad51ap1	NM_009013	RAD51 associated protein 1
1436036_at	1.54083	DOWN	Whsc1	XM_132006	Wolf-Hirschhorn syndrome candidate 1 (human)
1457298_at	1.54083	DOWN			Adult retina cDNA, RIKEN full-length enriched library, clone:A930017A10 product:unclassifiable, full insert sequence
1456914_at	1.54321	DOWN	AW209116		expressed sequence AW209116
1455719_at	1.54321	DOWN	Tubb5	NM_011655	tubulin, beta 5
1458125_at	1.5456	DOWN	C80913	NM_011274	0
1440607_at	1.5456	DOWN	Ches1	NM_183186	Checkpoint supressor 1, mRNA (cDNA clone MGC:107530 IMAGE:30008715)
1438831_at	1.5456	DOWN	Crk7	NM_026952	Protein kinase for splicing component (Pksc)
1453226_at	1.54799	DOWN	3000004C01Rik	NM_197959	RIKEN cDNA 3000004C01 gene
1436656_at	1.54799	DOWN	BC062109	NM_182841	cDNA sequence BC062109
1453107_s_at	1.54799	DOWN	Foxm1	NM_008021	forkhead box M1 /// phosphatidylethanolamine binding protein /// RIKEN cDNA 4933413G19 gene
1456140_at	1.54799	DOWN	Zic5	NM_022987	Opr
1434313_at	1.55	UP	6330407D12Rik	NM_175098	RIKEN cDNA 6330407D12 gene
1441233_at	1.55	UP	7120451J01Rik	NM_144807	RIKEN cDNA 7120451J01 gene; choline phosphotransferase 1
1456480_at	1.55	UP	9330186A19Rik	XM_488539	RIKEN cDNA 9330186A19 gene
1419091_a_at	1.55	UP	Anxa2	NM_007585	annexin A2
1458648_at	1.55	UP	AU042950		expressed sequence AU042950
1455416_at	1.55	UP	C130021I20	NM_177842	hypothetical protein C130021I20
1435903_at	1.55	UP	Cd300a	NM_170758	CD300A antigen
1418440_at	1.55	UP	Col8a1	NM_007739	procollagen, type VIII, alpha 1
1448710_at	1.55	UP	Cxcr4	NM_009911	chemokine (C-X-C motif) receptor 4
1417191_at	1.55	UP	Dnajb9	NM_013760	DnaJ (Hsp40) homolog, subfamily B, member 9
1427302_at	1.55	UP	Enpp3	NM_134005	ectonucleotide pyrophosphatase/phosphodiesterase 3
1425702_a_at	1.55	UP	Enpp5	NM_032003	ectonucleotide pyrophosphatase/phosphodiesterase 5
1454780_at	1.55	UP	Galntl4	NM_173739	UDP-N-acetyl-alpha-D-galactosamine:polypeptide N-acetylgalactosaminyltransferase-like 4
1416357_a_at	1.55	UP	Mcam	NM_023061	melanoma cell adhesion molecule
1421027_a_at	1.55	UP	Mef2c	NM_025282	myocyte enhancer factor 2C
1423516_a_at	1.55	UP	Nid2	NM_008695	nidogen 2
1423859_a_at	1.55	UP	Ptgds	NM_008963	prostaglandin D2 synthase (brain)
1418487_at	1.55	UP	Ripk4	NM_023663	receptor-interacting serine-threonine kinase 4
1423428_at	1.55	UP	Ror2	NM_013846	receptor tyrosine kinase-like orphan receptor 2
1457094_at	1.55	UP	She	NM_172530	src homology 2 domain-containing transforming protein E
1420697_at	1.55	UP	Slc15a3	NM_023044	solute carrier family 15, member 3
1425974_a_at	1.55	UP	Trim25	NM_009546	tripartite motif protein 25
1417168_a_at	1.55	UP	Usp2	NM_198091	ubiquitin specific peptidase 2
1420624_a_at	1.55	UP	Vamp8	NM_016794	vesicle-associated membrane protein 8
1443157_at	1.55	UP
1429166_s_at	1.5528	DOWN	Clmn	NM_053155	Calmin (Clmn), mRNA
1456280_at	1.5528	DOWN	Clspn	NM_175554	claspin homolog (Xenopus laevis)
1418497_at	1.5528	DOWN	Fgf13	NM_010200	fibroblast growth factor 13
1425424_at	1.5528	DOWN	MGC7817	XM_884414	hypothetical protein LOC620031
1449121_at	1.55521	DOWN	Fusip1	NM_010178	FUS interacting protein (serine-arginine rich) 1
1444269_at	1.55521	DOWN	Gpc6	NM_011821	Glypican 6, mRNA (cDNA clone MGC:32221 IMAGE:5008374)
1433950_at	1.55521	DOWN	Igsf21	NM_198610
1423123_at	1.55521	DOWN	Rad54l	NM_009015	RAD54 like (S. cerevisiae)
1425362_at	1.55763	DOWN	Hrbl	NM_145566	HIV-1 Rev binding protein-like
1417302_at	1.55763	DOWN	Rcor2	NM_054048	REST corepressor 2
1425483_at	1.55763	DOWN	Tox	NM_145711	thymocyte selection-associated HMG box gene
1434528_at	1.56	UP	Aard	NM_175503	alanine and arginine rich domain containing protein
1418472_at	1.56	UP	Aspa	NM_023113	aspartoacylase (aminoacylase) 2
1449363_at	1.56	UP	Atf3	NM_007498	activating transcription factor 3
1456295_at	1.56	UP	B230114P17Rik		RIKEN cDNA B230114P17 gene
1435227_at	1.56	UP	BCL11B	NM_021399	B-cell leukemia/lymphoma 11B
1423635_at	1.56	UP	Bmp2	NM_007553	bone morphogenetic protein 2
1416072_at	1.56	UP	Cd34	NM_133654	CD34 antigen
1452486_a_at	1.56	UP	Cryaa	NM_013501	crystallin, alpha A
1427537_at	1.56	UP	Eppk1	NM_144848	epiplakin 1
1438532_at	1.56	UP	Hmcn1	NM_001024720	hemicentin 1
1438672_at	1.56	UP	LOC676024	XM_001001678	parvin, beta; similar to parvin, beta
1438452_at	1.56	UP	Nebl	NM_028757	nebulette
1417483_at	1.56	UP	Nfkbiz	NM_030612	nuclear factor of kappa light polypeptide gene enhancer in B-cells inhibitor, zeta
1449187_at	1.56	UP	Pdgfa	NM_008808	platelet derived growth factor, alpha
1420411_a_at	1.56	UP	Pi4k2b	NM_028744	phosphatidylinositol 4-kinase type 2 beta
1456424_s_at	1.56	UP	Pltp	NM_011125	phospholipid transfer protein
1454906_at	1.56	UP	Rarb	NM_011243	retinoic acid receptor, beta
1426206_at	1.56	UP	Robo4	NM_028783	roundabout homolog 4 (Drosophila)
1429348_at	1.56	UP	Sema3c	NM_013657	sema domain, immunoglobulin domain (Ig), short basic domain, secreted, (semaphorin) 3C
1427924_at	1.56	UP	Stx17	NM_026343	syntaxin 17
1421594_a_at	1.56	UP	Sytl2	NM_031394	synaptotagmin-like 2
1452432_at	1.56	UP	Tfpi	NM_011576	tissue factor pathway inhibitor
1440608_at	1.56	UP			10 days neonate skin cDNA, RIKEN full-length enriched library, clone:4732488M12 product:unclassifiable, full insert sequence
1453370_at	1.56006	DOWN	Troap	XM_283286	trophinin associated protein
1439224_at	1.5625	DOWN	Ankib1	NM_001003909	7 days embryo whole body cDNA, RIKEN full-length enriched library, clone:C430010C20 product:unclassifiable, full insert sequence
1439634_at	1.56495	DOWN	4930505D03Rik	XM_137322	RIKEN cDNA 4930505D03 gene
1450886_at	1.56495	DOWN	Gsg2	NM_010353	germ cell-specific gene 2
1433892_at	1.56495	DOWN	Spag5	NM_017407	sperm associated antigen 5
1431235_at	1.56986	DOWN	1110061A14Rik		RIKEN cDNA 1110061A14 gene
1446383_at	1.56986	DOWN	Efna5	NM_010109	Ephrin A5 (Efna5), transcript variant 2, mRNA
1442270_at	1.56986	DOWN	Pbx3	NM_016768	Pre B-cell leukemia transcription factor 3 (Pbx3), mRNA
1451320_at	1.57	UP	3110043J09Rik	NM_028455	RIKEN cDNA 3110043J09 gene
1454926_at	1.57	UP	4930544G21Rik	NM_172430	RIKEN cDNA 4930544G21 gene
1451461_a_at	1.57	UP	Aldoc	NM_009657	aldolase 3, C isoform
1426334_a_at	1.57	UP	Bcl2l11	NM_207680	BCL2-like 11 (apoptosis facilitator)
1416405_at	1.57	UP	Bgn	NM_007542	biglycan
1427095_at	1.57	UP	Cdcp1	NM_133974	CUB domain containing protein 1
1422033_a_at	1.57	UP	Cntf	NM_053007	ciliary neurotrophic factor
1434369_a_at	1.57	UP	Cryab	NM_009964	crystallin, alpha B
1453011_at	1.57	UP	Dhrs6	NM_027208	dehydrogenase/reductase (SDR family) member 6
1460223_a_at	1.57	UP	Epb4.9	NM_013514	erythrocyte protein band 4.9
1437247_at	1.57	UP	Fosl2	NM_008037	fos-like antigen 2
1439506_at	1.57	UP	Gm98	XM_129233	gene model 98, (NCBI) /// gene model 1804, (NCBI)
1428837_at	1.57	UP	Klhl14	XM_128971	kelch-like 14 (Drosophila)
1417930_at	1.57	UP	Nab2	NM_008668	Ngfi-A binding protein 2
1419051_at	1.57	UP	Ovol1	NM_019935	OVO homolog-like 1 (Drosophila)
1430125_s_at	1.57	UP	Pqlc1	NM_025861	PQ loop repeat containing 1
1417600_at	1.57	UP	Slc15a2	NM_021301	solute carrier family 15 (H+/peptide transporter), member 2
1449135_at	1.57	UP	Sox18	NM_009236	SRY-box containing gene 18
1453172_at	1.57	UP	Stch	NM_030201	stress 70 protein chaperone, microsome-associated, human homolog
1415861_at	1.57	UP	Tyrp1	NM_031202	tyrosinase-related protein 1
1455983_at	1.57233	DOWN	Cdca2	NM_175384	cell division cycle associated 2
1435054_at	1.57233	DOWN	Eme1	NM_177752	essential meiotic endonuclease 1 homolog 1 (S. pombe)
1430175_at	1.5748	DOWN	4930588G05Rik		RIKEN cDNA 4930588G05 gene
1450312_at	1.5748	DOWN	Cdh20	NM_011800	cadherin 20
1442277_at	1.5748	DOWN	Chka	NM_013490	choline kinase alpha
1459381_at	1.5748	DOWN	Dach1	NM_007826	DACH protein (Dach)
1421213_at	1.57729	DOWN	Edaradd	NM_133643	EDAR (ectodysplasin-A receptor)-associated death domain
1446304_at	1.57729	DOWN	LRRC8D	NM_178701	leucine rich repeat containing 8D
1418357_at	1.57978	DOWN	Foxg1	NM_008241	forkhead box G1
1427544_a_at	1.57978	DOWN	Papola	NM_011112	poly (A) polymerase alpha
1460190_at	1.58	UP	Ap1m2	NM_009678	adaptor protein complex AP-1, mu 2 subunit
1458238_at	1.58	UP	Arid5b	NM_023598	AT rich interactive domain 5B (Mrf1 like)
1423365_at	1.58	UP	Cacna1g	NM_009783	calcium channel, voltage-dependent, T type, alpha 1G subunit
1450429_at	1.58	UP	Capn6	NM_007603	calpain 6
1416401_at	1.58	UP	Cd82	NM_007656
1450700_at	1.58	UP	Cdc42ep3	NM_026514	CDC42 effector protein (Rho GTPase binding) 3
1417845_at	1.58	UP	Cldn6	NM_018777	claudin 6
1416164_at	1.58	UP	Fbln5	NM_011812	fibulin 5
1435482_at	1.58	UP	Fibcd1	NM_178887	fibrinogen C domain containing 1
1426594_at	1.58	UP	Frmd4b	NM_145148	FERM domain containing 4B
1439793_at	1.58	UP	GJA3	NM_016975	gap junction protein, alpha 3
1417505_s_at	1.58	UP	Il11ra1	NM_010549	interleukin 11 receptor, alpha chain 1 /// interleukin 11 receptor, alpha chain 2
1418517_at	1.58	UP	Irx3	NM_008393	Iroquois related homeobox 3 (Drosophila)
1415897_a_at	1.58	UP	Mgst1	NM_019946	microsomal glutathione S-transferase 1
1430635_at	1.58	UP	Mlana	XM_129166	melan-A
1417129_a_at	1.58	UP	Mrg1	NM_010825	myeloid ecotropic viral integration site-related gene 1
1445539_at	1.58	UP	Pde7b	NM_013875	CAMP specific phosphodiesterase 7B (PDE7B gene)
1448602_at	1.58	UP	Pygm	NM_011224	muscle glycogen phosphorylase
1433683_at	1.58	UP	Rbm35b	NM_176838
1429726_at	1.58	UP	Slc16a9	NM_025807	solute carrier family 16 (monocarboxylic acid transporters), member 9
1416637_at	1.58	UP	Slc4a2	NM_009207	solute carrier family 4 (anion exchanger), member 2
1416689_at	1.58	UP	Tuft1	NM_011656	tuftelin 1
1442350_at	1.58	UP			0 day neonate skin cDNA, RIKEN full-length enriched library, clone:4632424N07 product:unclassifiable, full insert sequence
1444679_at	1.58479	DOWN	Phf21a	NM_138755
1436907_at	1.5873	DOWN	Nav1	NM_173437	neuron navigator 1
1453366_at	1.5873	DOWN	Tdrkh	XM_131021	tudor and KH domain containing protein
1442454_at	1.5873	DOWN	Top2a	NM_011623	topoisomerase (DNA) II alpha
1459183_at	1.5873	DOWN			PREDICTED: similar to protein of bilaterial origin like (XP376) [Mus musculus], mRNA sequence
1446332_at	1.58983	DOWN	Pcdhga12	NM_033595	Protocadherin gamma subfamily A, 10, mRNA (cDNA clone MGC:40648 IMAGE:5400956)
1416947_s_at	1.59	UP	Acaa1	NM_130864	acetyl-Coenzyme A acyltransferase 1 /// 3-ketoacyl-CoA thiolase B
1427996_at	1.59	UP	BC028528	NM_153513	cDNA sequence BC028528
1421512_at	1.59	UP	Cep2	XM_358344	centrosomal protein 2
1449091_at	1.59	UP	Cldn8	NM_018778	claudin 8
1434917_at	1.59	UP	Cobl	NM_172496	cordon-bleu
1419141_at	1.59	UP	Crygd	NM_007776	crystallin, gamma D
1437927_at	1.59	UP	Dlgh2	NM_011807	discs, large homolog 2 (Drosophila)
1437486_at	1.59	UP	Gprc5a	NM_181444
1416343_a_at	1.59	UP	Lamp2	NM_001017959	lysosomal membrane glycoprotein 2
1454086_a_at	1.59	UP	Lmo2	NM_008505	LIM domain only 2
1418808_at	1.59	UP	Rdh5	NM_134006	retinol dehydrogenase 5
1452899_at	1.59	UP	Rian		CDNA for MBII-343 snoRNA
1442365_at	1.59	UP	Rtn3	NM_001003930	Reticulon 3 (Rtn3), transcript variant 4, mRNA
1425767_a_at	1.59	UP	Six4	NM_011382	sine oculis-related homeobox 4 homolog (Drosophila)
1416464_at	1.59	UP	Slc4a1	NM_011403	solute carrier family 4 (anion exchanger), member 1
1439535_at	1.59236	DOWN	Dstn	NM_019771	Destrin (Dstn), mRNA
1442594_at	1.59236	DOWN	Ttk	NM_009445	Ttk protein kinase
1435155_at	1.5949	DOWN	Cgn	XM_131052	cingulin
1442409_at	1.5949	DOWN	D9Wsu90e		DNA segment, Chr 9, Wayne State University 90, expressed
1459497_at	1.5949	DOWN	Fdft1	NM_010191	Cathepsin B, mRNA (cDNA clone MGC:6211 IMAGE:3500700)
1450533_a_at	1.5949	DOWN	Plagl1	NM_009538	pleiomorphic adenoma gene-like 1
1450303_at	1.5949	DOWN	Vax2	NM_011912	ventral anterior homeobox containing gene 2
1426927_at	1.59744	DOWN	Ap3b2	NM_021492	adaptor-related protein complex 3, beta 2 subunit
1453802_at	1.6	UP	3732412D22Rik	NM_001001980	RIKEN cDNA 3732412D22 gene
1438719_at	1.6	UP	AI585793		expressed sequence AI585793
1448752_at	1.6	UP	Car2	NM_009801	carbonic anhydrase 2
1418712_at	1.6	UP	Cdc42ep5	NM_021454	CDC42 effector protein (Rho GTPase binding) 5
1419005_at	1.6	UP	Crybb3	NM_021352	crystallin, beta B3
1452388_at	1.6	UP	Hspa1a	NM_010479	heat shock protein 1A
1421105_at	1.6	UP	Jag1	NM_013822	jagged 1
1418936_at	1.6	UP	Maff	NM_010755	v-maf musculoaponeurotic fibrosarcoma oncogene family, protein F (avian)
1435367_at	1.6	UP	Mapk4	NM_172632	mitogen-activated protein kinase 4
1458509_at	1.6	DOWN	Mre11a	NM_018736	Globin inducing factor, fetal, mRNA (cDNA clone MGC:25252 IMAGE:3969390)
1431302_a_at	1.6	UP	Nudt7	NM_024437	nudix (nucleoside diphosphate linked moiety X)-type motif 7
1418090_at	1.6	UP	Plvap	NM_032398	plasmalemma vesicle associated protein
1449468_at	1.6	UP	St6galnac5	NM_012028	ST6 (alpha-N-acetyl-neuraminyl-2,3-beta-galactosyl-1,3)-N-acetylgalactosaminide alpha-2,6-sialyltransferase 5
1421990_at	1.6	UP	Syt1	NM_009306	synaptotagmin I
1418486_at	1.6	UP	Vnn1	NM_011704	vanin 1
1428434_at	1.6	UP	Zcchc12	NM_028325	zinc finger, CCHC domain containing 12
1423339_s_at	1.60256	DOWN	Ccdc16	NM_025884	coiled-coil domain containing 16
1420739_at	1.60256	DOWN	Cntn3	NM_008779	contactin 3
1436862_at	1.60514	DOWN	Doc2a	NM_010069	double C2, alpha
1457822_at	1.60514	DOWN	LOC100047318	NM_018872	similar to transmembrane protein 131; transmembrane protein 131
1430596_s_at	1.61	UP	1700110N18Rik	XM_283372	RIKEN cDNA 1700110N18 gene
1438798_at	1.61	UP	4931406P16Rik	NM_172741	RIKEN cDNA 4931406P16 gene
1438778_at	1.61	UP	A930025H08Rik		Adult retina cDNA, RIKEN full-length enriched library, clone:A930025H08 product:unclassifiable, full insert sequence
1459267_at	1.61	UP	Arf1	NM_007476	RIKEN cDNA 2310033P09 gene (2310033P09Rik), mRNA
1435084_at	1.61	UP	C730049O14Rik		RIKEN cDNA C730049O14 gene
1435680_a_at	1.61	UP	Dpp7	NM_031843	dipeptidylpeptidase 7
1439319_at	1.61	UP	Elf1	NM_007920	E74-like factor 1
1448499_a_at	1.61	UP	Ephx2	NM_007940	epoxide hydrolase 2, cytoplasmic
1437119_at	1.61	UP	Ern1	NM_023913	Endoplasmic reticulum (ER) to nucleus signalling 1 (Ern1), mRNA
1436994_a_at	1.61	UP	Hist1h1c	NM_015786	histone 1, H1c
1433754_at	1.61	UP	Mbnl2	NM_175341	muscleblind-like 2
1456777_at	1.61	UP	Mgam	XM_133071	maltase-glucoamylase
1422216_at	1.61	UP	Mid2	NM_011845	midline 2
1455037_at	1.61	UP	Plxna2	NM_008882	plexin A2
1427486_at	1.61	UP	Ptprb	NM_029928	protein tyrosine phosphatase, receptor type, B
1449124_at	1.61	UP	Rgl1	NM_016846	ral guanine nucleotide dissociation stimulator,-like 1
1416579_a_at	1.61	UP	Tacstd1	NM_008532	tumor-associated calcium signal transducer 1
1416238_at	1.61	UP	Tie1	NM_011587	tyrosine kinase receptor 1
1417283_at	1.61031	DOWN	Lynx1	NM_011838	Ly6/neurotoxin 1
1446117_at	1.61031	DOWN	Spire1	NM_176832	spire homolog 1 (Drosophila)
1435166_at	1.6129	DOWN	Cntn2	NM_011531	contactin 2
1438265_at	1.6129	DOWN	D8Ertd594e	NM_133791	DNA segment, Chr 8, ERATO Doi 594, expressed (D8Ertd594e), mRNA
1455695_at	1.61551	DOWN	9330109E03Rik		ST8 alpha-N-acetyl-neuraminide alpha-2,8-sialyltransferase 1
1428740_a_at	1.61812	DOWN	Pigt	NM_133779	phosphatidylinositol glycan, class T
1435968_at	1.61812	DOWN			Transcribed locus
1452203_at	1.62	UP	5830411E10Rik	NM_028696	RIKEN cDNA 5830411E10 gene
1448894_at	1.62	UP	Akr1b8	NM_008012	aldo-keto reductase family 1, member B8
1433742_at	1.62	UP	Ankrd15	NM_181404	ankyrin repeat domain 15
1435184_at	1.62	UP	B430320C24Rik		RIKEN cDNA B430320C24 gene
1448823_at	1.62	UP	Cxcl12	NM_021704	chemokine (C-X-C motif) ligand 12
1434196_at	1.62	UP	Dnaja4	NM_021422	DnaJ (Hsp40) homolog, subfamily A, member 4
1436329_at	1.62	UP	Egr3	NM_018781	early growth response 3
1416803_at	1.62	UP	Fkbp7	NM_010222	FK506 binding protein 7
1418280_at	1.62	UP	Klf6	NM_011803	Kruppel-like factor 6
1440619_at	1.62	UP	Mapk8ip1	NM_011162	mitogen activated protein kinase 8 interacting protein 1
1435981_at	1.62	UP	NAV2	NM_175272	neuron navigator 2
1416494_at	1.62	UP	Ndufs5	NM_134104	NADH dehydrogenase (ubiquinone) Fe-S protein 5
1416688_at	1.62	UP	Snap91	NM_013669	synaptosomal-associated protein 91
1445290_at	1.62075	DOWN	Hunk	NM_015755	Hormonally upregulated Neu-associated kinase (Hunk), mRNA
1440446_at	1.62075	DOWN	Nkd1	NM_027280	Naked cuticle 1 homolog (Drosophila), mRNA (cDNA clone MGC:40995 IMAGE:1429943)
1423070_at	1.62075	DOWN	Rpl21	NM_019647	ribosomal protein L21
1458663_at	1.62338	DOWN	Large	NM_010687	Like-glycosyltransferase (Large), mRNA
1456974_at	1.62338	DOWN	Onecut1	NM_008262	one cut domain, family member 1
1435420_at	1.63	UP	C330016K18Rik	XM_132642	PREDICTED: similar to solute carrier family 4, sodium bicarbonate cotransporter, member 5 [Mus musculus], mRNA sequence
1418608_at	1.63	UP	Calml3	NM_027416	calmodulin-like 3
1427640_a_at	1.63	UP	Cbfa2t1h	NM_009822	CBFA2T1 identified gene homolog (human)
1441107_at	1.63	UP	Dmrta2	NM_172296	doublesex and mab-3 related transcription factor like family A2
1455280_at	1.63	UP	Frem1	NM_177863	Fras1 related extracellular matrix protein 1
1416761_at	1.63	UP	Hsd11b2	NM_008289
1423062_at	1.63	UP	Igfbp3	NM_008343	insulin-like growth factor binding protein 3
1450286_at	1.63	UP	Npr3	NM_008728	natriuretic peptide receptor 3
1434877_at	1.63	UP	Nptx1	NM_008730	neuronal pentraxin 1
1416168_at	1.63	UP	Serpinf1	NM_011340	serine (or cysteine) peptidase inhibitor, clade F, member 1
1426353_at	1.63	UP	Stat6	NM_009284	signal transducer and activator of transcription 6
1426397_at	1.63	UP	Tgfbr2	NM_009371	transforming growth factor, beta receptor II
1438704_at	1.63	UP	Trim63	XM_485457	tripartite motif-containing 63
1426588_at	1.63	UP	Tspan10	NM_145363	tetraspanin 10
1430965_at	1.63132	DOWN	9430064K01Rik		RIKEN cDNA 9430064K01 gene
1418409_at	1.63132	DOWN	Jrk	NM_008415	jerky
1449877_s_at	1.63132	DOWN	Kifc1	NM_053173	kinesin family member C1
1421230_a_at	1.63132	DOWN	Msi2h	NM_054043	Musashi homolog 2 (Drosophila)
1459488_at	1.63132	DOWN	ZC3H13	NM_026083	zinc finger CCCH type containing 13
1421928_at	1.635	UP	Epha4	NM_007936	Eph receptor A4
1417878_at	1.63934	DOWN	E2f1	NM_007891	E2F transcription factor 1
1420547_at	1.63934	DOWN	Galc	NM_008079	galactosylceramidase
1426301_at	1.64	UP	Alcam	NM_009655	activated leukocyte cell adhesion molecule
1417732_at	1.64	UP	Anxa8	NM_013473	annexin A8
1439717_at	1.64	UP	B230362M20Rik	NM_177273	RIKEN cDNA B230362M20 gene
1446929_at	1.64	UP	C76824		BTB and CNC homology 2 (Bach2), mRNA
1450182_at	1.64	UP	Clcnka	NM_024412	chloride channel Ka
1417839_at	1.64	UP	Cldn5	NM_013805	claudin 5
1458518_at	1.64	UP	Cpeb2	NM_175937	cytoplasmic polyadenylation element binding protein 2
1423584_at	1.64	UP	Igfbp7	NM_008048	insulin-like growth factor binding protein 7
1457483_at	1.64	UP	LOC100044968	XM_001473421	similar to modulator recognition factor 2; AT rich interactive domain 5B (MRF1-like)
1452464_a_at	1.64	UP	Metapl1	NM_025633	methionine aminopeptidase-like 1
1422567_at	1.64	UP	Niban	NM_022018	niban protein
1422473_at	1.64	UP	Pde4b	NM_019840	phosphodiesterase 4B, cAMP specific
1417814_at	1.64	UP	Pla2g5	NM_011110	phospholipase A2, group V
1417801_a_at	1.64	UP	Ppfibp2	NM_008905	protein tyrosine phosphatase, receptor-type, F interacting protein, binding protein 2
1421132_at	1.64	UP	Pvrl3	NM_021496	poliovirus receptor-related 3
1418187_at	1.64	UP	Ramp2	NM_019444	receptor (calcitonin) activity modifying protein 2
1419356_at	1.64745	DOWN	Klf7	NM_033563	Kruppel-like factor 7 (ubiquitous)
1435581_at	1.65	UP	Bace2	NM_019517	beta-site APP-cleaving enzyme 2
1434606_at	1.65	UP	Erbb3	NM_010153	v-erb-b2 erythroblastic leukemia viral oncogene homolog 3 (avian)
1426725_s_at	1.65	UP	Ets1	NM_011808	E26 avian leukemia oncogene 1, 5' domain
1441214_at	1.65	UP	Exph5	NM_176846	exophilin 5
1421072_at	1.65	UP	Irx5	NM_018826	Iroquois related homeobox 5 (Drosophila)
1451808_at	1.65	UP	Kcnj4	NM_008427	potassium inwardly-rectifying channel, subfamily J, member 4
1427083_a_at	1.65	UP	Map4k5	NM_024275	mitogen-activated protein kinase kinase kinase kinase 5
1419662_at	1.65	UP	Ogn	NM_008760	osteoglycin
1450414_at	1.65	UP	Pdgfb	NM_011057	platelet derived growth factor, B polypeptide
1427005_at	1.65	UP	Plk2	NM_152804	polo-like kinase 2 (Drosophila)
1425681_a_at	1.65	UP	Prnd	NM_023043	prion protein dublet
1426085_a_at	1.65	UP	Pxn	NM_011223	paxillin
1456933_at	1.65	UP	SMG7	NM_001005507	Smg-7 homolog, nonsense mediated mRNA decay factor (C. elegans)
1437781_at	1.65017	DOWN	INSM2	NM_020287	insulinoma-associated 2
1422734_a_at	1.65017	DOWN	Myb	NM_010848	myeloblastosis oncogene
1448978_at	1.65289	DOWN	Ngef	NM_019867	neuronal guanine nucleotide exchange factor
1459691_at	1.65289	DOWN
1448690_at	1.65563	DOWN	Kcnk1	NM_008430	potassium channel, subfamily K, member 1
1458884_at	1.65837	DOWN	AA960558	NM_133942	Pleckstrin homology domain containing, family A (phosphoinositide binding specific) member 1 (Plekha1), mRNA
1418881_at	1.65837	DOWN	Efcbp2	NM_054095	EF hand calcium binding protein 2
1455114_at	1.65837	DOWN	Ung2	XM_127523	uracil DNA glycosylase 2
1438697_at	1.66	UP	4632425D07Rik	XM_485684	RIKEN cDNA 4632425D07 gene
1437137_at	1.66	UP	6430550H21Rik	NM_172930	RIKEN cDNA 6430550H21 gene
1430583_at	1.66	UP	C130076O07Rik	NM_176930	RIKEN cDNA C130076O07 gene
1449277_at	1.66	UP	Ccl19	NM_011888	chemokine (C-C motif) ligand 19
1424595_at	1.66	UP	F11r	NM_172647	F11 receptor
1433707_at	1.66	UP	Gabra4	NM_010251	Gamma-aminobutyric acid (GABA-A) receptor, subunit alpha 4, mRNA (cDNA clone MGC:106499 IMAGE:6828002)
1437123_at	1.66	UP	Mmrn2	NM_153127	multimerin 2
1449286_at	1.66	UP	Ntng1	NM_030699	netrin G1
1453139_at	1.66	UP	Nudt12	NM_026497	nudix (nucleoside diphosphate linked moiety X)-type motif 12
1429861_at	1.66	UP	Pcdh9	XM_139187	protocadherin 9
1424797_a_at	1.66	UP	Pitx2	NM_011098	paired-like homeodomain transcription factor 2
1418703_at	1.66	UP	Rbms1	NM_020296	RNA binding motif, single stranded interacting protein 1
1439882_at	1.66	UP	SEC23IP	NM_001029982	Sec23 interacting protein
1420361_at	1.66	UP	Slc11a1	NM_013612	solute carrier family 11 (proton-coupled divalent metal ion transporters), member 1
1434800_at	1.66	UP	Sv2b	NM_153579	synaptic vesicle glycoprotein 2 b
1439305_at	1.66113	DOWN			Transcribed locus, weakly similar to NP_795929.1 hypothetical protein LOC319587 [Mus musculus]
1432431_s_at	1.66945	DOWN	1110033L15Rik		RIKEN cDNA 1110033L15 gene
1430887_s_at	1.67	UP	1700112E06Rik	XM_484353	RIKEN cDNA 1700112E06 gene
1435285_at	1.67	UP	2700082O15Rik	XM_619790	metallophosphoesterase domain containing 2
1428535_at	1.67	UP	9430020K01Rik	XM_140198	RIKEN cDNA 9430020K01 gene
1442115_at	1.67	UP	9430028L06Rik	NM_172629	RIKEN cDNA 9430028L06 gene
1437469_at	1.67	UP	A030007D23Rik	NM_178763	RIKEN cDNA A030007D23 gene
1452067_at	1.67	UP	Asahl	NM_025972	N-acylsphingosine amidohydrolase (acid ceramidase)-like
1438861_at	1.67	UP	Bnc2	NM_172870	basonuclin 2
1437385_at	1.67	UP	ccbe1	NM_178793	collagen and calcium binding EGF domains 1
1430172_a_at	1.67	UP	Cyp4f16	NM_024442	cytochrome P450, family 4, subfamily f, polypeptide 16 /// similar to cytochrome P450 CYP4F16
1458802_at	1.67	UP	Hivep3	NM_010657	human immunodeficiency virus type I enhancer binding protein 3
1421551_s_at	1.67	UP	Ifi202b	NM_008327	interferon activated gene 202B
1417156_at	1.67	UP	Krt1-19	NM_008471	keratin complex 1, acidic, gene 19
1424096_at	1.67	UP	Krt2-5	NM_027011	keratin complex 2, basic, gene 5
1416053_at	1.67	UP	Lrrn1	NM_008516	leucine rich repeat protein 1, neuronal
1453152_at	1.67	UP	Mamdc2	NM_174857	MAM domain containing 2
1435046_at	1.67	UP	Myo1d	NM_177390	Myosin ID (Myo1d), mRNA
1454809_at	1.67	UP	Ncoa7	NM_172495	nuclear receptor coactivator 7
1429399_at	1.67	UP	Rnf125	NM_026301	ring finger protein 125
1427008_at	1.67	UP	Rnf43	NM_172448
1460250_at	1.67	UP	Sostdc1	NM_025312	sclerostin domain containing 1
1419537_at	1.67	UP	Tcfec	NM_031198	transcription factor EC
1448821_at	1.67	UP	Tyr	NM_011661	tyrosinase
1421883_at	1.67224	DOWN	Elavl2	NM_010486	ELAV (embryonic lethal, abnormal vision, Drosophila)-like 2 (Hu antigen B)
1424535_at	1.67504	DOWN	4930521E07Rik	NM_026260	RIKEN cDNA 4930521E07 gene
1425452_s_at	1.68	UP	AW125753	NM_029007
1449145_a_at	1.68	UP	Cav1	NM_007616	caveolin, caveolae protein 1
1452077_at	1.68	UP	Ddx3y	NM_012008	DEAD (Asp-Glu-Ala-Asp) box polypeptide 3, Y-linked
1431020_a_at	1.68	UP	Fgfr1op2	NM_026218	FGFR1 oncogene partner 2
1420847_a_at	1.68	UP	Fgfr2	NM_010207	fibroblast growth factor receptor 2
1444164_at	1.68	UP	Fkbp3	NM_013902	PRP39 pre-mRNA processing factor 39 homolog (yeast), mRNA (cDNA clone MGC:37077 IMAGE:4951324)
1449002_at	1.68	UP	Phlda3	NM_013750	pleckstrin homology-like domain, family A, member 3
1424906_at	1.68	UP	Pqlc3	NM_172574
1441315_s_at	1.68	UP	Slc19a2	NM_054087	solute carrier family 19 (thiamine transporter), member 2
1436392_s_at	1.68	UP	Tcfap2c	NM_009335	transcription factor AP-2, gamma
1452540_a_at	1.68067	DOWN	Hist1h2bc	NM_023422	histone 1, H2bc /// histone 1, H2be /// histone 1, H2bl /// histone 1, H2bm /// histone 1, H2bp
1450713_at	1.68634	DOWN	Cspg5	NM_013884	chondroitin sulfate proteoglycan 5
1448877_at	1.68634	DOWN	Dlx2	NM_010054	distal-less homeobox 2
1452524_a_at	1.68634	DOWN	Elavl3	NM_010487	ELAV (embryonic lethal, abnormal vision, Drosophila)-like 3 (Hu antigen C)
1441536_at	1.68634	DOWN	Hmgcs1	NM_145942	3-hydroxy-3-methylglutaryl-Coenzyme A synthase 1, mRNA (cDNA clone MGC:36620 IMAGE:5347038)
1445576_at	1.69	UP	4930526H21Rik	XM_205565	RIKEN cDNA 4930526H21 gene
1426089_a_at	1.69	UP	BC003331	NM_145511	cDNA sequence BC003331
1433147_at	1.69	UP	Cald1	NM_145575	caldesmon 1
1426673_at	1.69	UP	Cdh3	NM_007665	cadherin 3
1448326_a_at	1.69	UP	Crabp1	NM_013496	cellular retinoic acid binding protein I
1428306_at	1.69	UP	Ddit4	NM_029083	DNA-damage-inducible transcript 4
1457843_at	1.69	UP	E130115E03Rik	NM_177139	RIKEN cDNA E130115E03 gene
1417662_at	1.69	UP	Elk3	NM_013508	ELK3, member of ETS oncogene family
1423348_at	1.69	UP	Fzd8	NM_008058	frizzled homolog 8 (Drosophila)
1440830_at	1.69	UP	Gpr116	XM_283438	G protein-coupled receptor 116
1416411_at	1.69	UP	Gstm2	NM_008183	glutathione S-transferase, mu 2
1444494_at	1.69	UP	KBTBD10	NM_001081087	kelch repeat and BTB (POZ) domain containing 10
1422557_s_at	1.69	UP	Mt1	NM_013602	metallothionein 1
1420425_at	1.69	UP	Prdm1	NM_007548	PR domain containing 1, with ZNF domain
1440879_at	1.69205	DOWN	Abca9	NM_147220	ATP-binding cassette transporter sub-family A member 9
1437932_a_at	1.69205	DOWN	Cldn1	NM_016674	claudin 1
1458874_at	1.69205	DOWN	FAT3	NM_001080814	FAT tumor suppressor homolog 3 (Drosophila)
1455325_at	1.69492	DOWN	A230057G18Rik	XM_489103	RIKEN cDNA A230057G18 gene
1441625_at	1.69492	DOWN	A930033C01Rik	XM_132396	RIKEN cDNA A930033C01 gene
1452106_at	1.695	UP	Npnt	NM_001029836	nephronectin
1425213_at	1.69779	DOWN	6430514L14Rik	NM_029784	RIKEN cDNA 6430514L14 gene
1454737_at	1.69779	DOWN	Dusp9	NM_029352	dual specificity phosphatase 9
1423824_at	1.7	UP	5031439A09Rik	NM_026582	RIKEN cDNA 5031439A09 gene
1453087_at	1.7	UP	6330403L08Rik		RIKEN cDNA 6330403L08 gene
1456891_at	1.7	UP	Dennd2c	NM_177857
1416697_at	1.7	UP	Dpp4	NM_010074	dipeptidylpeptidase 4
1424932_at	1.7	UP	Egfr	NM_007912	epidermal growth factor receptor
1435436_at	1.7	UP	Epas1	NM_010137	endothelial PAS domain protein 1; similar to Endothelial PAS domain protein 1
1448303_at	1.7	UP	Gpnmb	NM_053110	glycoprotein (transmembrane) nmb
1419123_a_at	1.7	UP	Pdgfc	NM_019971	platelet-derived growth factor, C polypeptide
1417741_at	1.7	UP	Pygl	NM_133198	liver glycogen phosphorylase
1426261_s_at	1.7	UP	Ugt1a2	NM_013701	UDP glucuronosyltransferase 1 family, polypeptide A2 /// UDP glucuronosyltransferase 1 family, polypeptide A6A /// UDP glycosyltransferase 1 family, polypeptide A10 /// UDP glucuronosyltransferase 1 family, polypeptide A7C /// UDP glucuronosyltransferase 1 family, polypeptide A5 /// UDP glucuronosyltransferase 1 family, polypeptide A9 /// UDP glucuronosyltransferase 1 family, polypeptide A6B /// …
1449425_at	1.7	UP	Wnt2	NM_023653	wingless-related MMTV integration site 2
1459747_at	1.7	UP
1436127_at	1.70648	DOWN	Crhbp	NM_198408	corticotropin releasing hormone binding protein
1439510_at	1.7094	DOWN	Sgol1	NM_028232	shugoshin-like 1 (S. pombe)
1422256_at	1.7094	DOWN	Sstr2	NM_009217	somatostatin receptor 2
1438285_at	1.71	UP	2210015D19Rik	XM_488586	RIKEN cDNA 2210015D19 gene
1435624_at	1.71	UP	9030409G11Rik	NM_144531	RIKEN cDNA 9030409G11 gene
1416077_at	1.71	UP	Adm	NM_009627	adrenomedullin
1455561_at	1.71	UP	Cndp1	NM_177450	carnosine dipeptidase 1 (metallopeptidase M20 family)
1449368_at	1.71	UP	Dcn	NM_007833	decorin
1451297_at	1.71	UP	Gulo	NM_178747	gulonolactone (L-) oxidase
1439650_at	1.71	UP	Rtn4	NM_024226	reticulon 4
1426231_at	1.71	UP	Vit	NM_028813	vitrin
1435701_at	1.71	UP			13 days embryo lung cDNA, RIKEN full-length enriched library, clone:D430017B04 product:unclassifiable, full insert sequence
1455460_at	1.71233	DOWN	6430547I21Rik		Mus musculus, clone IMAGE:5356935
1422398_at	1.71233	DOWN	Hist1h1e	NM_015787	histone 1, H1e
1429478_at	1.71527	DOWN	6720463M24Rik	NM_175265	RIKEN cDNA 6720463M24 gene
1442248_at	1.71527	DOWN	D430034N21		hypothetical protein D430034N21
1441027_at	1.71821	DOWN	GPR133	NM_001081342	G protein-coupled receptor 133
1428146_s_at	1.72	UP	Acaa2	NM_177470	acetyl-Coenzyme A acyltransferase 2 (mitochondrial 3-oxoacyl-Coenzyme A thiolase)
1449603_at	1.72	UP	AI594671		expressed sequence AI594671
1434421_at	1.72	UP	B930052A04Rik	NM_177193	RIKEN cDNA B930052A04 gene
1448393_at	1.72	UP	Cldn7	NM_016887	claudin 7
1424131_at	1.72	UP	Col6a3	XM_484897	procollagen, type VI, alpha 3
1424067_at	1.72	UP	Icam1	NM_010493	intercellular adhesion molecule
1454638_a_at	1.72	UP	Pah	NM_008777	phenylalanine hydroxylase
1422601_at	1.72	UP	Serpinb9	NM_009256	serine (or cysteine) peptidase inhibitor, clade B, member 9
1448612_at	1.72	UP	Sfn	NM_018754	stratifin
1426716_at	1.72	UP	Tdrd7	NM_146142	tudor domain containing 7
1444479_at	1.72	UP
1458719_at	1.72117	DOWN	Glp1r	NM_021332	Glucagon-like peptide 1 receptor (Glp1r), mRNA
1442301_at	1.72414	DOWN	AW060742		expressed sequence AW060742
1439111_at	1.72414	DOWN	Tsc22d1	NM_207652	TSC22 domain family, member 1
1429423_at	1.72712	DOWN	4930518I15Rik		RIKEN cDNA 4930518I15 gene
1435805_at	1.72712	DOWN	Lin7a	XM_193582	lin 7 homolog a (C. elegans)
1418754_at	1.73	UP	Adcy8	NM_009623	adenylate cyclase 8
1417279_at	1.73	UP	Itpr1	NM_010585	inositol 1,4,5-triphosphate receptor 1
1457030_at	1.73	UP	Mirg	XM_488655	miRNA containing gene
1421907_at	1.73	UP	Pparbp	NM_013634	peroxisome proliferator activated receptor binding protein
1420583_a_at	1.73	UP	Rora	NM_013646	RAR-related orphan receptor alpha
1423340_at	1.73	UP	Tcfap2b	NM_009334	transcription factor AP-2 beta
1438325_at	1.7331	DOWN	Evi1	NM_007963	ecotropic viral integration site 1
1430139_at	1.7331	DOWN	Hells	NM_008234	helicase, lymphoid specific
1443232_at	1.73913	DOWN			PREDICTED: Mus musculus hypothetical protein LOC (LOC545859), mRNA
1425582_a_at	1.74	UP	Emcn	NM_016885
1418450_at	1.74	UP	Islr	NM_012043	immunoglobulin superfamily containing leucine-rich repeat
1426322_a_at	1.74	UP	Kcnmb2	NM_028231	potassium large conductance calcium-activated channel, subfamily M, beta member 2
1426221_at	1.74	UP	Loh11cr2a	NM_172767	loss of heterozygosity, 11, chromosomal region 2, gene A homolog (human)
1447849_s_at	1.74	UP	maf	XM_001478110	similar to c-Maf long form; avian musculoaponeurotic fibrosarcoma (v-maf) AS42 oncogene homolog
1455161_at	1.7452	DOWN	AI504432	NM_173787	expressed sequence AI504432
1422773_at	1.74825	DOWN	Myt1	NM_008665	myelin transcription factor 1
1450770_at	1.75	UP	3632451O06Rik	NM_026142	RIKEN cDNA 3632451O06 gene
1423411_at	1.75	UP	BC013481	NM_178446	cDNA sequence BC013481
1424890_at	1.75	UP	Bnc1	NM_007562	basonuclin 1
1417013_at	1.75	UP	Hspb8	NM_030704	heat shock 27kDa protein 8
1422079_at	1.75	UP	Prkch	NM_008856	protein kinase C, eta
1425284_a_at	1.75	UP	Rab27a	NM_023635	RAB27A, member RAS oncogene family
1451794_at	1.75	UP	Tmcc3	NM_172051	transmembrane and coiled coil domains 3
1415903_at	1.75131	DOWN	Slc38a1	NM_134086	solute carrier family 38, member 1
1415694_at	1.75131	DOWN	Wars	NM_011710	tryptophanyl-tRNA synthetase
1459258_at	1.75439	DOWN	2610021K21Rik	NM_030172	PREDICTED: Mus musculus RIKEN cDNA 2610021K21 gene (2610021K21Rik), mRNA
1433086_at	1.75747	DOWN	5930427J20Rik		RIKEN cDNA 5930427J20 gene
1448261_at	1.76	UP	Cdh1	NM_009864	cadherin 1
1433956_at	1.76	UP	Cdh5	NM_009868	cadherin 5
1418283_at	1.76	UP	Cldn4	NM_009903	claudin 4
1431734_a_at	1.76	UP	Dnajb4	NM_025926	DnaJ (Hsp40) homolog, subfamily B, member 4
1454646_at	1.76	UP	Tcp11l2	NM_146008
1435386_at	1.76	UP	Vwf	NM_011708	Von Willebrand factor homolog
1459670_at	1.76056	DOWN	Hnrpll	NM_144802	Heterogeneous nuclear ribonucleoprotein L-like (Hnrpll), mRNA
1435323_a_at	1.76056	DOWN	Oact1	NM_153546	O-acyltransferase (membrane bound) domain containing 1
1456673_at	1.76367	DOWN	AL022943		expressed sequence AL022943
1455923_at	1.76678	DOWN	Kctd8	NM_175519	potassium channel tetramerisation domain containing 8
1437481_at	1.76678	DOWN	Spdy1	XM_128768	speedy homolog 1 (Drosophila)
1440445_at	1.76991	DOWN	4831410G09Rik		Pax6 opposite strand transcript 1
1443335_at	1.76991	DOWN	Pdzrn3	NM_018884	PDZ domain containing RING finger 3, mRNA (cDNA clone MGC:11956 IMAGE:3600603)
1429847_a_at	1.77	UP	4833418A01Rik	NM_198005	RIKEN cDNA 4833418A01 gene
1455342_at	1.77	UP	A230083H22Rik		RIKEN cDNA A230083H22 gene
1416946_a_at	1.77	UP	Acaa1a	NM_130864
1424842_a_at	1.77	UP	Arhgap24	NM_029270	Rho GTPase activating protein 24
1422674_s_at	1.77	UP	Crygb	NM_007775	crystallin, gamma B /// crystallin, gamma C
1449549_at	1.77	UP	Efnb2	NM_010111	ephrin B2
1420534_at	1.77	UP	Gucy1a3	NM_021896	guanylate cyclase 1, soluble, alpha 3
1420664_s_at	1.77	UP	Procr	NM_011171	protein C receptor, endothelial
1423323_at	1.77	UP	Tacstd2	NM_020047	tumor-associated calcium signal transducer 2
1437128_a_at	1.77305	DOWN	A630033E08Rik	NM_177358	RIKEN cDNA A630033E08 gene
1442369_at	1.7762	DOWN	4832406H04Rik		RIKEN cDNA 4832406H04 gene
1419077_at	1.77936	DOWN	Mpp3	NM_007863	membrane protein, palmitoylated 3 (MAGUK p55 subfamily member 3)
1448664_a_at	1.78	UP	Apeg1	NM_007463	aortic preferentially expressed gene 1
1428485_at	1.78	UP	Car12	NM_178396	carbonic anyhydrase 12
1420686_at	1.78	UP	Cryba4	NM_021351	crystallin, beta A4
1435447_at	1.78	UP	Mip	NM_008600	major intrinsic protein of eye lens fiber
1425892_a_at	1.78	UP	Pnoc	NM_010932	prepronociceptin
1455664_at	1.78	UP	Rtn4rl1	NM_177708	Reticulon 4 receptor-like 1, mRNA (cDNA clone MGC:40829 IMAGE:5368560)
1440886_at	1.78253	DOWN	Cdc37l1	NM_025950	cell division cycle 37 homolog (S. cerevisiae)-like 1
1433110_at	1.78571	DOWN	5830474E16Rik		RIKEN cDNA 5830474E16 gene
1458241_at	1.78891	DOWN	9230105E05Rik		RIKEN cDNA 1700006J14 gene (1700006J14Rik), mRNA
1417707_at	1.79	UP	B230342M21Rik	NM_133898	RIKEN cDNA B230342M21 gene
1429685_at	1.79	UP	C030002O17Rik	NM_172432	RIKEN cDNA C030002O17 gene
1430127_a_at	1.79	UP	Ccnd2	NM_009829	cyclin D2
1434489_at	1.79	UP	Elmo3	NM_172760	engulfment and cell motility 3, ced-12 homolog (C. elegans)
1451021_a_at	1.79	UP	Klf5	NM_009769	Kruppel-like factor 5
1426914_at	1.79	UP	Marveld2	NM_178410	MARVEL (membrane-associating) domain containing 2
1435911_s_at	1.79	UP	Slc2a12	NM_178934	solute carrier family 2 (facilitated glucose transporter), member 12
1436662_at	1.79	UP	Sorcs1	NM_021377	VPS10 domain receptor protein SORCS 1
1425784_a_at	1.79211	DOWN	Olfm1	NM_019498	olfactomedin 1
1452021_a_at	1.79533	DOWN	Hes6	NM_019479	hairy and enhancer of split 6 (Drosophila)
1437760_at	1.79856	DOWN	Galnt12	NM_172693	UDP-N-acetyl-alpha-D-galactosamine:polypeptide N-acetylgalactosaminyltransferase 12
1427891_at	1.8	UP	Gimap6	NM_153175	GTPase, IMAP family member 6
1424254_at	1.8	UP	Ifitm1	NM_026820	interferon induced transmembrane protein 1
1439852_at	1.8	UP
1445717_at	1.80505	DOWN	E130108L08Rik		RIKEN cDNA E130108L08 gene
1424557_at	1.80832	DOWN	Zcchc9	NM_145453	zinc finger, CCHC domain containing 9
1423760_at	1.81	UP	Cd44	NM_009851	CD44 antigen
1417649_at	1.81	UP	Cdkn1c	NM_009876	cyclin-dependent kinase inhibitor 1C (P57)
1416811_s_at	1.81	UP	Ctla2a	NM_007796	cytotoxic T lymphocyte-associated protein 2 alpha /// cytotoxic T lymphocyte-associated protein 2 beta
1420512_at	1.81	UP	Dkk2	NM_020265	dickkopf homolog 2 (Xenopus laevis)
1448873_at	1.81	UP	Ocln	NM_008756	occludin
1421924_at	1.81	UP	Slc2a3	NM_011401	solute carrier family 2 (facilitated glucose transporter), member 3
1418935_at	1.81	UP	Trpm1	XM_358370	transient receptor potential cation channel, subfamily M, member 1
1446880_at	1.81	UP
1416444_at	1.81488	DOWN	Elovl2	NM_019423	elongation of very long chain fatty acids (FEN1/Elo2, SUR4/Elo3, yeast)-like 2
1417155_at	1.81818	DOWN	Mycn	NM_008709	v-myc myelocytomatosis viral related oncogene, neuroblastoma derived
1418799_a_at	1.82	UP	Col17a1	NM_007732	procollagen, type XVII, alpha 1
1418365_at	1.82	UP	Ctsh	NM_007801	cathepsin H
1425893_a_at	1.82	UP	Fhit	NM_010210	fragile histidine triad gene
1419300_at	1.82	UP	Flt1	NM_010228	FMS-like tyrosine kinase 1
1418452_at	1.82	UP	Gng2	NM_010315	guanine nucleotide binding protein (G protein), gamma 2 subunit
1418983_at	1.82	UP	Inadl	NM_001005787	InaD-like (Drosophila)
1422583_at	1.82	UP	Rab3b	NM_023537	RAB3B, member RAS oncogene family
1418310_a_at	1.82	UP	Rlbp1	NM_020599	retinaldehyde binding protein 1
1430392_at	1.82149	DOWN	9530086O07Rik		RIKEN cDNA 9530086O07 gene
1446682_at	1.82149	DOWN	Zswim6	XM_358311	Zinc finger, SWIM domain containing 6, mRNA (cDNA clone MGC:29327 IMAGE:5025391)
1415964_at	1.82482	DOWN	Scd1	NM_009127	stearoyl-Coenzyme A desaturase 1
1421430_at	1.82815	DOWN	Rad51l1	NM_009014	RAD51-like 1 (S. cerevisiae)
1421301_at	1.82815	DOWN	Zic2	NM_009574	Zic finger protein of the cerebellum 2
1424214_at	1.83	UP	9130213B05Rik	NM_145562	RIKEN cDNA 9130213B05 gene
1448931_at	1.83	UP	F2rl1	NM_007974	coagulation factor II (thrombin) receptor-like 1
1433914_at	1.83	UP	LOC381236	XM_355172	expressed sequence AI747699
1446897_at	1.8315	DOWN
1445032_at	1.83486	DOWN	Dapk1	NM_029653	Death associated protein kinase 1 (Dapk1), mRNA
1441482_at	1.83486	DOWN	Map2k6	NM_011943
1454866_s_at	1.84	UP	Clic6	NM_172469	chloride intracellular channel 6
1418322_at	1.84	UP	Crem	NM_013498	cAMP responsive element modulator
1457231_at	1.84	UP	Hif1a	NM_010431	Hypoxia inducible factor 1, alpha subunit, mRNA (cDNA clone MGC:13907 IMAGE:4019056)
1438060_at	1.84	UP	Npas3	NM_013780	RIKEN cDNA 4930423H22 gene
1425254_at	1.84162	DOWN	Foxn4	NM_148935	forkhead box N4
1459894_at	1.84162	DOWN	LOC544963	XM_619138	IQ motif containing GTPase activating protein 2
1440874_at	1.84162	DOWN	Slco5a1	NM_172841	solute carrier organic anion transporter family, member 5A1
1426758_s_at	1.845	UP	Gtl2	NM_144513	GTL2, imprinted maternally expressed untranslated mRNA
1419465_at	1.84502	DOWN	Nkd2	NM_028186	naked cuticle 2 homolog (Drosophila)
1419694_at	1.84502	DOWN	St8sia1	NM_011374	ST8 alpha-N-acetyl-neuraminide alpha-2,8-sialyltransferase 1
1429761_at	1.84843	DOWN	Rtn1	NM_001007596	reticulon 1
1455535_at	1.85	UP	A730017D01Rik		RIKEN cDNA A730017D01 gene
1420581_at	1.85	UP	Gpr143	NM_010951	G protein-coupled receptor 143
1454974_at	1.85	UP	Ntn1	NM_008744	netrin 1
1422804_at	1.85	UP	Serpinb6b	NM_011454	serine (or cysteine) peptidase inhibitor, clade B, member 6b
1444151_at	1.85185	DOWN	2600009P04Rik		ELAV (embryonic lethal, abnormal vision, Drosophila)-like 3 (Hu antigen C) (Elavl3), mRNA
1425822_a_at	1.85185	DOWN	Dtx1	NM_008052	deltex 1 homolog (Drosophila)
1424114_s_at	1.85333	UP	Lamb1-1	NM_008482	laminin B1 subunit 1
1426255_at	1.85529	DOWN	Nefl	NM_010910	neurofilament, light polypeptide
1440375_at	1.85874	DOWN	5730419I09Rik	NM_029081	RIKEN cDNA 5730419I09 gene
1422948_s_at	1.85874	DOWN	Hist1h4h	NM_153173	histone 1, H4h /// histone 1, H4c /// histone 1, H4i /// histone 1, H4j /// histone 1, H4k /// histone 1, H4m /// histone 1, H4a /// histone 1, H4b
1418306_at	1.86	UP	Crybb1	NM_023695	crystallin, beta B1
1428384_at	1.86	UP	D4Bwg0951e	NM_026821	DNA segment, Chr 4, Brigham & Women's Genetics 0951 expressed
1424375_s_at	1.86	UP	Gimap4	NM_174990	GTPase, IMAP family member 4
1428394_at	1.86	UP	Phyhd1	NM_172267	phytanoyl-CoA dioxygenase domain containing 1 /// leucine rich repeat containing 8
1418666_at	1.86	UP	Ptx3	NM_008987	pentraxin related gene
1439220_at	1.8622	DOWN	Ank3	NM_009670	Ankyrin 3, epithelial (Ank3), transcript variant 2, mRNA
1444827_at	1.8622	DOWN	Btbd9	NM_172618	MKIAA1880 protein
1448991_a_at	1.86567	DOWN	Ina	NM_146100	internexin neuronal intermediate filament protein, alpha
1417654_at	1.86567	DOWN	Sdc4	NM_011521	syndecan 4
1440695_at	1.86567	DOWN			12 days embryo eyeball cDNA, RIKEN full-length enriched library, clone:D230039G15 product:hypothetical protein, full insert sequence
1458447_at	1.86916	DOWN	Cenpf	XM_129658	centromere autoantigen F
1424606_at	1.87	UP	Cplx3	NM_146223	complexin 3
1418059_at	1.87	UP	Eltd1	NM_133222	EGF, latrophilin seven transmembrane domain containing 1
1434539_at	1.87	UP	Lrrn3	NM_010733	leucine rich repeat protein 3, neuronal
1416271_at	1.87	UP	Perp	NM_022032	PERP, TP53 apoptosis effector
1424351_at	1.87	UP	Wfdc2	NM_026323	WAP four-disulfide core domain 2
1441823_at	1.87617	DOWN	Rai17	NM_183208	Retinoic acid induced 17, mRNA (cDNA clone MGC:86031 IMAGE:6856060)
1423280_at	1.8797	DOWN	Stmn2	NM_025285	stathmin-like 2
1438336_at	1.88	UP	Fbxw11	NM_134015	F-box and WD-40 domain protein 11 (Fbxw11), mRNA
1420499_at	1.88	UP	Gch1	NM_008102	GTP cyclohydrolase 1
1436713_s_at	1.88	UP	MEG3		maternally expressed 3
1436970_a_at	1.88	UP	Pdgfrb	NM_008809	platelet derived growth factor receptor, beta polypeptide
1421375_a_at	1.88	UP	S100a6	NM_011313	S100 calcium binding protein A6 (calcyclin)
1416783_at	1.88	UP	Tac1	NM_009311	tachykinin 1
1455930_at	1.88	UP			hypothetical LOC433566 /// hypothetical LOC434498
1429977_at	1.88324	DOWN	9030425L15Rik		RIKEN cDNA 9030425L15 gene
1436894_at	1.88324	DOWN	D1Ertd471e		RIKEN cDNA 5330438I03 gene (5330438I03Rik), mRNA
1433434_at	1.89	UP	AW551984	NM_178737	expressed sequence AW551984
1450857_a_at	1.89	UP	Col1a2	NM_007743	procollagen, type I, alpha 2
1422860_at	1.89	UP	Nts	NM_024435	neurotensin
1441637_at	1.89394	DOWN	F730047E07Rik	NM_199467	RIKEN cDNA F730047E07 gene, mRNA (cDNA clone IMAGE:5320271)
1443885_at	1.89753	DOWN			7 days neonate cerebellum cDNA, RIKEN full-length enriched library, clone:A730060K18 product:unclassifiable, full insert sequence
1427883_a_at	1.9	UP	Col3a1	NM_009930	procollagen, type III, alpha 1
1416613_at	1.9	UP	Cyp1b1	NM_009994	cytochrome P450, family 1, subfamily b, polypeptide 1
1437569_at	1.9	UP	Gm644	NM_023438	gene model 644, (NCBI)
1422667_at	1.9	UP	Krt1-15	NM_008469	keratin complex 1, acidic, gene 15
1453357_at	1.9	UP	Tdrd9	XM_127120	tudor domain containing 9
1429657_at	1.9	UP	Za20d2	NM_009551	zinc finger, A20 domain containing 2
1419628_at	1.90476	DOWN	Chx10	NM_007701	C. elegans ceh-10 homeo domain containing homolog
1429871_at	1.9084	DOWN	Hmmr	NM_013552	hyaluronan mediated motility receptor (RHAMM)
1417946_at	1.91	UP	Abhd3	NM_134130	abhydrolase domain containing 3
1440807_at	1.91	UP	Acvrinp1	NM_015823	Membrane associated guanylate kinase, WW and PDZ domain containing 2 (Magi2), mRNA
1416041_at	1.91	UP	Sgk	NM_011361	serum/glucocorticoid regulated kinase
1427677_a_at	1.91	UP	Sox6	NM_011445	SRY-box containing gene 6
1424162_at	1.91	UP	Trim29	NM_023655	tripartite motif protein 29
1457270_at	1.91205	DOWN	B230343A10Rik		RIKEN cDNA B230343A10 gene
1440701_at	1.91205	DOWN
1440633_at	1.91571	DOWN	Neil3	NM_146208	nei like 3 (E. coli)
1457723_at	1.91571	DOWN	Pspc1	NM_025682	Paraspeckle protein 1, mRNA (cDNA clone MGC:25428 IMAGE:3711631)
1437403_at	1.92	UP	E130306M17Rik	NM_177271	RIKEN cDNA E130306M17 gene
1436932_at	1.92	UP	GRHL3	NM_001013756	grainyhead-like 3 (Drosophila)
1418301_at	1.92	UP	Irf6	NM_016851	interferon regulatory factor 6
1451978_at	1.92	UP	Loxl1	NM_010729	lysyl oxidase-like 1
1418788_at	1.92	UP	Tek	NM_013690	endothelial-specific receptor tyrosine kinase
1433050_at	1.92308	DOWN	5730478J17Rik		RIKEN cDNA 5730478J17 gene
1459045_at	1.92678	DOWN	Golph4	NM_175193	golgi phosphoprotein 4
1430143_at	1.93	UP	4930426D05Rik		RIKEN cDNA 4930426D05 gene
1450671_at	1.93	UP	Cryba1	NM_009965	crystallin, beta A1
1460214_at	1.93	UP	Pcp4	NM_008791	Purkinje cell protein 4
1425528_at	1.93	UP	Prrx1	NM_001025570	paired related homeobox 1
1418412_at	1.93	UP	Tpd52l1	NM_009413	tumor protein D52-like 1
1448162_at	1.93	UP	Vcam1	NM_011693	vascular cell adhesion molecule 1
1459246_at	1.93424	DOWN	D230021J17Rik		RIKEN cDNA D230021J17 gene
1422520_at	1.93424	DOWN	Nef3	NM_008691	neurofilament 3, medium
1438891_at	1.93798	DOWN	Catnd2	NM_008729	Catenin (cadherin associated protein), delta 2 (Ctnnd2), mRNA
1438540_at	1.94	UP	COL25A1	NM_198711	collagen, type XXV, alpha 1
1437401_at	1.94	UP	Igf1	NM_010512	Insulin-like growth factor 1, mRNA (cDNA clone MGC:18617 IMAGE:4194295)
1428479_at	1.94	UP	Nfatc1	NM_016791	nuclear factor of activated T-cells, cytoplasmic, calcineurin-dependent 1
1427126_at	1.945	UP	Hspa1b	NM_010478	heat shock protein 1B
1434264_at	1.94553	DOWN	Ank2	NM_178655	ankyrin 2, brain
1448213_at	1.95	UP	Anxa1	NM_010730	annexin A1
1425286_at	1.95	UP	Crygn	NM_153076	crystallin, gamma N
1422024_at	1.95	UP	Fli1	NM_008026	Friend leukemia integration 1
1453321_at	1.95	UP	Fndc1	XM_354975	fibronectin type III domain containing 1
1458842_at	1.95	UP	LOC100044065	NM_011855	odd Oz/ten-m homolog 1 (Drosophila); similar to odd Oz/ten-m homolog 1 (Drosophila)
1429459_at	1.95	UP	Sema3d	NM_028882	sema domain, immunoglobulin domain (Ig), short basic domain, secreted, (semaphorin) 3D
1428089_at	1.95	UP	Slitrk1	NM_199065	SLIT and NTRK-like family, member 1
1424221_at	1.95	UP	Susd4	NM_144796	sushi domain containing 4
1457886_at	1.95312	DOWN	LOC552873		hypothetical LOC552873
1448083_at	1.96	UP	A930012M17	XM_484423	PREDICTED: hypothetical protein A930012M17 [Mus musculus], mRNA sequence
1437540_at	1.96	UP	Mcoln3	NM_134160	mucolipin 3
1428942_at	1.96	UP	Mt2	NM_008630	metallothionein 2
1420719_at	1.96	UP	Tex15	NM_031374	testis expressed gene 15
1448955_s_at	1.96464	DOWN	Cadps	NM_012061	Ca<2+>dependent activator protein for secretion
1423607_at	1.97	UP	Lum	NM_008524	lumican
1436115_at	1.97239	DOWN	Gm266	XM_138272	0
1435493_at	1.98	UP	Dsp	XM_621314	desmoplakin
1435064_a_at	1.98	UP	Tmem27	NM_020626	transmembrane protein 27
1459557_at	1.98807	DOWN	Zbtb16	XM_134826	PREDICTED: zinc finger and BTB domain containing 16 [Mus musculus], mRNA sequence
1418320_at	1.99	UP	Prss8	NM_133351	protease, serine, 8 (prostasin)
1421399_at	1.99601	DOWN	Insm1	NM_016889	insulinoma-associated 1
1419011_at	2	UP	Cryba2	NM_021541	crystallin, beta A2
1417644_at	2	UP	Sspn	NM_010656	sarcospan
1419179_at	2	UP	Txnl4	NM_025299	thioredoxin-like 4
1452065_at	2.01	UP	BC027127	NM_145967	cDNA sequence BC027127
1420763_at	2.01	UP	Klk4	NM_019928	kallikrein 4 (prostase, enamel matrix, prostate)
1428547_at	2.01	UP	Nt5e	NM_011851	5' nucleotidase, ecto
1417837_at	2.01	UP	Phlda2	NM_009434	pleckstrin homology-like domain, family A, member 2
1421457_a_at	2.01	UP	Samsn1	NM_023380	SAM domain, SH3 domain and nuclear localisation signals, 1
1416778_at	2.01	UP	Sdpr	NM_138741	serum deprivation response
1419693_at	2.02	UP	Colec12	NM_130449	collectin sub-family member 12
1423016_a_at	2.02	UP	Gypa	NM_010369	glycophorin A
1418199_at	2.02	UP	Hemgn	NM_053149	hemogen
1440353_at	2.02	UP	Ntf5	NM_198190	neurotrophin 5
1425530_a_at	2.02	UP	Stx3	NM_011502	syntaxin 3
1441326_at	2.0202	DOWN	Cp	NM_007752	ceruloplasmin
1447475_at	2.03	UP	Gm967	XM_355152	gene model 967, (NCBI)
1416564_at	2.03	UP	Sox7	NM_011446	SRY-box containing gene 7
1421811_at	2.03	UP	Thbs1	NM_011580	thrombospondin 1
1455165_at	2.03	UP			RAR-related orphan receptor alpha, mRNA (cDNA clone MGC:5892 IMAGE:3592667)
1430112_at	2.03252	DOWN	Wdr66	XM_485681	WD repeat domain 66 /// similar to hypothetical protein MGC33630
1442062_at	2.03666	DOWN	7120426M23Rik		MAD homolog 2 (Drosophila), mRNA (cDNA clone MGC:29095 IMAGE:5066237)
1416965_at	2.04	UP	Pcsk1n	NM_013892	proprotein convertase subtilisin/kexin type 1 inhibitor
1440355_at	2.05	UP	Kctd12b	NM_175429	potassium channel tetramerisation domain containing 12b
1420650_at	2.06	UP	Atbf1	NM_007496	AT motif binding factor 1
1448510_at	2.06	UP	Efna1	NM_010107	ephrin A1
1418158_at	2.06	UP	Trp63	NM_011641	transformation related protein 63
1421117_at	2.065	UP	Dst	NM_010081	dystonin
1437923_at	2.06612	DOWN	AI314760		expressed sequence AI314760
1419473_a_at	2.07	UP	Cck	NM_031161	cholecystokinin
1442156_at	2.07	UP	E030030I06Rik	XM_286230	RIKEN cDNA E030030I06 gene
1427183_at	2.07	UP	Efemp1	NM_146015	epidermal growth factor-containing fibulin-like extracellular matrix protein 1
1435192_at	2.07039	DOWN	Sox3	NM_009237	SRY-box containing gene 3
1423851_a_at	2.07469	DOWN	Tmem46	NM_145463	transmembrane protein 46
1425045_at	2.079	DOWN	Pla2g4b	XM_355378	phospholipase A2, group IVB (cytosolic)
1418271_at	2.08768	DOWN	Bhlhb5	NM_021560	basic helix-loop-helix domain containing, class B5
1418509_at	2.09	UP	Cbr2	NM_007621	carbonyl reductase 2
1440495_at	2.10084	DOWN	Dmt2		dorso-medial telencephalon gene 2
1458889_at	2.10084	DOWN	Evl	NM_007965	Ena-vasodilator stimulated phosphoprotein
1455947_at	2.10526	DOWN	9630025C22	NM_177597
1448201_at	2.10526	DOWN	Sfrp2	NM_009144	secreted frizzled-related sequence protein 2
1449850_at	2.11	UP	Scube1	NM_022723	signal peptide, CUB domain, EGF-like 1
1437967_at	2.11	UP	Ttn	NM_011652	PREDICTED: Mus musculus similar to hypothetical protein FLJ39502 (LOC546765), mRNA
1438239_at	2.11416	DOWN	Mid1	NM_010797	midline 1
1455799_at	2.12314	DOWN	Rorb	NM_146095	RAR-related orphan receptor beta
1442494_at	2.13	UP	C79242		expressed sequence C79242
1440870_at	2.13	UP	Prdm16	NM_027504	MKIAA1675 protein
1450736_a_at	2.14	UP	Hbb-bh1	NM_008219	hemoglobin Z, beta-like embryonic chain
1439622_at	2.14133	DOWN	Rassf4	NM_178045	Ras association (RalGDS/AF-6) domain family 4
1418876_at	2.14592	DOWN	Foxd1	NM_008242	forkhead box D1
1443158_at	2.15	UP	Scmh1	NM_013883	Sex comb on midleg homolog 1 (Scmh1), mRNA
1415978_at	2.1692	DOWN	Tubb3	NM_023279	tubulin, beta 3
1429896_at	2.17	UP	5830408B19Rik		RIKEN cDNA 5830408B19 gene
1439066_at	2.17	UP	Angpt1	NM_009640	angiopoietin 1
1457147_at	2.17	UP	BC026657	XM_619731	cDNA sequence BC026657
1430353_at	2.17	UP	Glis3	NM_175459	GLIS family zinc finger 3
1422975_at	2.17	UP	Mme	NM_008604	membrane metallo endopeptidase
1433462_a_at	2.18	UP	Pi4k2a	NM_145501	phosphatidylinositol 4-kinase type 2 alpha
1457289_at	2.18818	DOWN	Nr2e1	NM_152229	nuclear receptor subfamily 2, group E, member 1
1426896_at	2.18818	DOWN	Zfp191	NM_021559	zinc finger protein 191
1426225_at	2.2	UP	Rbp4	NM_011255	retinol binding protein 4, plasma
1436821_at	2.20264	DOWN	Plcxd3	NM_177355	phosphatidylinositol-specific phospholipase C, X domain containing 3
1416627_at	2.21	UP	Spint1	NM_016907	serine protease inhibitor, Kunitz type 1
1443175_at	2.21239	DOWN	A830010M09Rik		RIKEN cDNA A830010M09 gene
1456951_at	2.21239	DOWN	mybl1	NM_008651	myeloblastosis oncogene-like 1
1418457_at	2.22	UP	Cxcl14	NM_019568	chemokine (C-X-C motif) ligand 14
1419204_at	2.24719	DOWN	Dll1	NM_007865	delta-like 1 (Drosophila)
1421182_at	2.25	UP	Clec1b	NM_019985	C-type lectin domain family 1, member b
1456387_at	2.25734	DOWN	Nol4	NM_199024	nucleolar protein 4
1422652_at	2.27	UP	Cryga	NM_007774	crystallin, gamma A
1421633_a_at	2.27	UP	Hapln1	NM_013500	hyaluronan and proteoglycan link protein 1
1451580_a_at	2.27	UP	Ttr	NM_013697	transthyretin
1441779_at	2.2779	DOWN	9530006C21Rik		RIKEN cDNA 9530006C21 gene
1440248_at	2.28	UP	Casc4	NM_177054	cancer susceptibility candidate 4
1417408_at	2.28	UP	F3	NM_010171	coagulation factor III
1417860_a_at	2.28	UP	Spon2	NM_133903	spondin 2, extracellular matrix protein
1448669_at	2.28311	DOWN	Dkk3	NM_015814	dickkopf homolog 3 (Xenopus laevis)
1428455_at	2.31	UP	Col14a1	NM_181277	procollagen, type XIV, alpha 1
1450988_at	2.31481	DOWN	Lgr5	NM_010195	leucine rich repeat containing G protein coupled receptor 5
1423183_at	2.32	UP	Lgi1	NM_020278	leucine-rich repeat LGI family, member 1
1457086_at	2.32558	DOWN	LOC434147	XM_489169	hypothetical LOC434147
1426155_a_at	2.33	UP	Osr2	NM_054049	odd-skipped related 2 (Drosophila)
1428741_at	2.33645	DOWN	Elavl4	NM_010488	ELAV (embryonic lethal, abnormal vision, Drosophila)-like 4 (Hu antigen D)
1441429_at	2.33645	DOWN	Irs4	NM_010572	insulin receptor substrate 4
1447454_at	2.33645	DOWN	Kif5c	NM_008449	Kinesin family member 5C (Kif5c), mRNA
1418782_at	2.34	UP	Rxrg	NM_009107	retinoid X receptor gamma
1423146_at	2.36967	DOWN	Hes5	NM_010419	hairy and enhancer of split 5 (Drosophila)
1440347_at	2.37	UP	Arhgap10	NM_030113	Rho GTPase activating protein 10 (Arhgap10), mRNA
1429046_at	2.37	UP	Smurf2	NM_025481	SMAD specific E3 ubiquitin protein ligase 2
1437162_at	2.38	UP	Gpiap1	NM_016739	GPI-anchored membrane protein 1 (Gpiap1), mRNA
1444016_at	2.39	UP	C430014K04Rik		RIKEN cDNA C430014K04 gene
1434474_at	2.39234	DOWN	Abca5	NM_147219	ATP-binding cassette, sub-family A (ABC1), member 5
1416645_a_at	2.40385	DOWN	Afp	NM_007423	alpha fetoprotein
1441572_at	2.40385	DOWN	C030036D22Rik		RIKEN cDNA C030036D22 gene
1425166_at	2.41546	DOWN	Rbl1	NM_011249	retinoblastoma-like 1 (p107)
1421190_at	2.44	UP	Gabrb3	NM_008071	gamma-aminobutyric acid (GABA-A) receptor, subunit beta 3
1451716_at	2.44	UP	Mafb	NM_010658	v-maf musculoaponeurotic fibrosarcoma oncogene family, protein B (avian)
1448507_at	2.44499	DOWN	Efhd1	NM_028889	EF hand domain containing 1
1419905_s_at	2.45	UP	Hpgd	NM_008278	hydroxyprostaglandin dehydrogenase 15 (NAD)
1419393_at	2.48	UP	Abcg5	NM_031884	ATP-binding cassette, sub-family G (WHITE), member 5
1423169_at	2.48756	DOWN	Taf7	NM_175770	TAF7 RNA polymerase II, TATA box binding protein (TBP)-associated factor
1435239_at	2.49	UP	Gria1	NM_008165	glutamate receptor, ionotropic, AMPA1 (alpha 1)
1434719_at	2.56	UP	A2m	NM_175628	alpha-2-macroglobulin
1419332_at	2.56	UP	Egfl6	NM_019397	EGF-like-domain, multiple 6
1416203_at	2.57	UP	Aqp1	NM_007472	aquaporin 1
1419485_at	2.58	UP	Foxc1	NM_008592	forkhead box C1
1436650_at	2.58398	DOWN	Filip1	XM_486240	filamin A interacting protein 1
1437121_at	2.59	UP	Dennd1c	NM_153551
1442725_at	2.6	UP	AI663975		Adult male epididymis cDNA, RIKEN full-length enriched library, clone:9230106H08 product:unclassifiable, full insert sequence
1422912_at	2.6	UP	Bmp4	NM_007554	bone morphogenetic protein 4
1448870_at	2.61097	DOWN	Ltbp1	NM_206958	latent transforming growth factor beta binding protein 1
1456634_at	2.62467	DOWN	9830001H06Rik	XM_283804	RIKEN cDNA 9830001H06 gene
1454855_at	2.64	UP	Magi2	NM_015823	membrane associated guanylate kinase, WW and PDZ domain containing 2
1428184_at	2.73224	DOWN	3110035E14Rik	NM_178399	RIKEN cDNA 3110035E14 gene
1422929_s_at	2.73598	DOWN	Atoh7	NM_016864	atonal homolog 7 (Drosophila)
1426412_at	2.73973	DOWN	Neurod1	NM_010894	neurogenic differentiation 1
1423754_at	2.74	UP	Ifitm3	NM_025378	interferon induced transmembrane protein 3
1423500_a_at	2.74	UP	Sox5	NM_011444	SRY-box containing gene 5
1436998_at	2.76	UP	Ankrd43	NM_183173	ankyrin repeat domain 43
1418376_at	2.80112	DOWN	Fgf15	NM_008003	fibroblast growth factor 15
1449422_at	2.84091	DOWN	Cdh4	NM_009867	cadherin 4
1448550_at	2.85	UP	Lbp	NM_008489	lipopolysaccharide binding protein
1444980_at	2.89855	DOWN	C730009D12		Adult male liver tumor cDNA, RIKEN full-length enriched library, clone:C730009D12 product:unclassifiable, full insert sequence
1418989_at	2.92	UP	Ctse	NM_007799	cathepsin E
1431074_a_at	2.92	UP	Pitpnc1	NM_145823	phosphatidylinositol transfer protein, cytoplasmic 1
1460044_at	3.01205	DOWN	ONECUT2	NM_194268	one cut domain, family member 2
1418129_at	3.04878	DOWN	Dhcr24	NM_053272	24-dehydrocholesterol reductase
1450723_at	3.14465	DOWN	Isl1	NM_021459	ISL1 transcription factor, LIM/homeodomain (islet 1)
1449470_at	3.16456	DOWN	Dlx1	NM_010053	distal-less homeobox 1
1427974_s_at	3.18471	DOWN	Cacna1d	NM_028981	calcium channel, voltage-dependent, L type, alpha 1D subunit
1425960_s_at	3.20513	DOWN	Pax6	NM_013627	paired box gene 6
1423150_at	3.20513	DOWN	Sgne1	NM_009162	secretory granule neuroendocrine protein 1, 7B2 protein
1418710_at	3.23625	DOWN	Cd59a	NM_007652	CD59a antigen
1435349_at	3.25	UP	Nrp2	NM_010939	neuropilin 2
1422450_at	3.25733	DOWN	Ctnnd1	NM_007615	catenin (cadherin associated protein), delta 1
1437798_at	3.27	UP	6720422M22Rik		RIKEN cDNA 6720422M22 gene
1419430_at	3.58423	DOWN	Cyp26a1	NM_007811	cytochrome P450, family 26, subfamily a, polypeptide 1
1459921_at	3.82	UP	Nxph1	NM_008751	neurexophilin 1
1422839_at	3.83142	DOWN	Neurog2	NM_009718	neurogenin 2
1449502_at	4.31	UP	Dazl	NM_010021	deleted in azoospermia-like
1437904_at	4.59	UP	Drbp1	NM_153405
1437885_at	4.62	UP	D030029J20Rik		RIKEN cDNA D030029J20 gene
1437588_at	5.40541	DOWN	Pou4f2	NM_138944	POU domain, class 4, transcription factor 2
1456923_at	7.40741	DOWN	Trpm3	NM_177341	transient receptor potential cation channel, subfamily M, member 3
1436964_at	7.63	UP	D7Ertd715e	XM_622411	DNA segment, Chr 7, ERATO Doi 715, expressed
1457588_at	9.00901	DOWN	C76213		expressed sequence C76213
1418705_at	9.05	UP	Crx	NM_007770	cone-rod homeobox containing gene
