# Supplementary material for: Pax6 Is Required for Normal Cell-Cycle Exit and the Differentiation Kinetics of Retinal Progenitor Cells
Source: PLoS One. 2013 Sep 20;8(9):e76489. doi: 10.1371/journal.pone.0076489 (PMC3779171; doi:10.1371/journal.pone.0076489)
Supplement: Table S2 — List of differentially expressed genes found in the microarray analysis and validated in situ. (XLS) [file pone.0076489.s010.xls]

## Sheet: Sheet1
Targets found in arraya and validated in-situ
affy_id	Symbol	fc	Up/Down	GeneTitle
1418357_at	Foxg1	1.57978	DOWN	forkhead box G1
1450533_a_at	Plagl1	1.5949	DOWN	pleiomorphic adenoma gene-like 1
1450194_a_at	Myb	1.7331	DOWN	myeloblastosis oncogene
1417649_at	Cdkn1c	1.81	UP	cyclin-dependent kinase inhibitor 1C (P57)
1434745_at	Ccnd2	1.84	UP	cyclin D2
1425254_at	Foxn4	1.84162	DOWN	forkhead box N4
1419628_at	Chx10	1.90476	DOWN	C. elegans ceh-10 homeo domain containing homolog
1418271_at	Bhlhb5	2.08768	DOWN	basic helix-loop-helix domain containing, class B5
1448201_at	Sfrp2	2.10526	DOWN	secreted frizzled-related sequence protein 2
1418876_at	Foxd1	2.14592	DOWN	forkhead box D1
1419204_at	Dll1	2.24719	DOWN	delta-like 1 (Drosophila)
1423146_at	Hes5	2.36967	DOWN	hairy and enhancer of split 5 (Drosophila)
1422929_s_at	Atoh7	2.73598	DOWN	atonal homolog 7 (Drosophila)
1426412_at	Neurod1	2.73973	DOWN	neurogenic differentiation 1
1418376_at	Fgf15	2.80112	DOWN	fibroblast growth factor 15
1450723_at	Isl1	3.14465	DOWN	ISL1 transcription factor, LIM/homeodomain (islet 1)
1422839_at	Neurog2	3.83142	DOWN	neurogenin 2
1437588_at	Pou4f2	5.40541	DOWN	POU domain, class 4, transcription factor 2
1456923_at	Trpm3	7.40741	DOWN	transient receptor potential cation channel, subfamily M, member 3
1418705_at	Crx	9.05	UP	cone-rod homeobox containing gene
1422912_at	Bmp4	2.6	UP	bone morphogenetic protein 4
1457289_at	Nr2e1	2.18818	DOWN	nuclear receptor subfamily 2, group E, member 1
1417155_at	Mycn	1.81818	DOWN	v-myc myelocytomatosis viral related oncogene, neuroblastoma derived
1438891_at	Catnd2	1.93798	DOWN	Catenin (cadherin associated protein), delta 2 (Ctnnd2), mRNA
